1           **First isolation of virulent *Tenacibaculum maritimum***  
2           **strains from diseased orbicular batfish (*Platax orbicularis*)**  
3                           **farmed in Tahiti Island**

4 Pierre Lopez <sup>1¶</sup>, Denis Saulnier <sup>1¶\*</sup>, Shital Swarup-Gaucher <sup>2</sup>, Rarahu David <sup>2</sup>, Christophe Lau <sup>2</sup>,  
5 Revahere Taputuarai <sup>2</sup>, Corinne Belliard <sup>1</sup>, Caline Basset <sup>1</sup>, Victor Labrune <sup>1</sup>, Arnaud Marie <sup>3</sup>, Jean  
6 François Bernardet <sup>4</sup>, Eric Duchaud <sup>4</sup>

7

8

9 <sup>1</sup> Ifremer, IRD, Institut Louis-Malardé, Univ Polynésie française, EIO, Labex Corail, F-98719

10 Taravao, Tahiti, Polynésie française, France

11 <sup>2</sup> DRM, Direction des ressources marines, Fare Ute Immeuble Le caill, BP 20 – 98713 Papeete, Tahiti,

12 Polynésie française

13 <sup>3</sup> Labofarm Finalab Veterinary Laboratory Group, 4 rue Théodore Botrel, 22600 Loudéac, France

14 <sup>4</sup> Unité VIM, INRAE, Université Paris-Saclay, 78350 Jouy-en-Josas, France

15 \* Corresponding author

16 E-mail: [denis.saulnier@ifremer.fr](mailto:denis.saulnier@ifremer.fr)

## 17 **Abstract**

18 The orbicular batfish (*Platax orbicularis*), also called 'Paraha peue' in Tahitian, is the most important  
19 marine fish species reared in French Polynesia. Sudden and widespread outbreaks of severe 'white-  
20 patch disease' have occurred since 2011 in batfish farms one to three weeks after the transfer of  
21 juveniles from bio-secured hatcheries to lagoon cages. With cumulative mortality ranging from 20 to  
22 90%, the sustainability of aquaculture of this species is severely threatened.

23 In this study, we describe for the first time the isolation from diseased batfish of several strains  
24 belonging to the species *Tenacibaculum maritimum*, a major pathogen of many marine fish species.  
25 Histopathological analysis, an experimental bath challenge and a field monitoring study showed that  
26 *T. maritimum* is associated with white-patch disease. Moreover, molecular and serological analyses  
27 performed on representative strains revealed some degree of genetic diversity among the isolates, a  
28 finding of primary importance for epidemiological studies and for the development of management  
29 and control strategies such as vaccination.

## 30 **1 Introduction**

31  
32 The orbicular batfish (*Platax orbicularis*, family *Ephippidae*) is a fish species inhabiting the top 30  
33 metres depth over tropical reefs of the western Pacific [1]. It is widely distributed from the Indo-  
34 Pacific region to the Red Sea in East Africa, with a northern limit in south Japan and a southern limit  
35 in Australia and New Caledonia [2]. In French Polynesia, the batfish is highly appreciated as a food by  
36 the local population, but the wild stock is rapidly decreasing, probably as a result of high fishing  
37 pressure and climate change that severely disturb the coral communities [3]. To promote local  
38 sustainable aquaculture, the governmental department of marine resources (DRM) decided to focus  
39 effort on captive breeding and rearing of orbicular batfish. Since 2011, the governmental hatchery  
40 VAIA (Vairao, Tahiti, French Polynesia) has produced eighty thousand fry annually, reared inland in  
41 bio-secured conditions (i.e. in filtered and UV treated seawater). Four production cycles are completed  
2

42 per year, allowing an annual production of 50–80 metric tons. One to two-month-old juvenile fish  
43 (mean weight, 1 and 10 g) are then transferred to different fish farms in lagoons. However, recurrent  
44 mortalities occur almost systematically during the first two months of growth in the lagoon cages,  
45 causing losses of 20–90% of production and threatening the sustainability of aquaculture based on this  
46 species. One to three weeks following their transfer to net cages in the lagoon, the fish show  
47 symptoms of disease, with loss of appetite, frayed fins, whitish patches on the tegument, followed by  
48 ulcers, necrosis and death. Little was known about the status of pathogens and diseases associated with  
49 this tropical fish species under local farming conditions and, consequently, this disease was simply  
50 named 'white-patch disease', based on the clinical symptoms. Light microscopy examination of  
51 fragments of skin lesions revealed abundant rod-shaped and gliding bacteria potentially belonging to  
52 the genus *Tenacibaculum*.

53 The genus *Tenacibaculum* (family *Flavobacteriaceae*, phylum *Bacteroidetes*) currently comprises 31  
54 validly named species (<http://www.bacterio.net/tenacibaculum.html>), all retrieved from marine  
55 environments [4]. Among these, *T. dicentrarchi*, *T. discolor*, *T. finnmarkense*, *T. gallaicum*, *T.*  
56 *maritimum*, *T. piscium* and *T. soleae* are responsible for ulcerative conditions that affect a large variety  
57 of cultured and wild marine fish species and are collectively known as tenacibaculosis [5].  
58 Tenacibaculosis is generally associated with gross external lesions such as ulcerative and necrotic skin  
59 lesions, haemorrhagic mouth, frayed fins and tail rot [5]. The disease was originally described in 1977  
60 in cultured red (*Pagrus major*) and black (*Acanthopagrus schlegeli*) seabream in Japan [6]. The  
61 causative agent was subsequently identified as *Tenacibaculum maritimum* (formerly *Flexibacter*  
62 *maritimus*) [7], a filamentous, Gram negative, gliding bacterium. Since then, *T. maritimum* has been  
63 shown to be responsible for considerable losses in marine aquaculture worldwide, affecting a large  
64 variety of wild and cultured marine fish species. For example, *T. maritimum* has been found to be  
65 associated with mortality events occurring in Atlantic salmon (*Salmo salar*) in Australia [8], Chinook  
66 salmon (*Oncorhynchus tshawytscha*) in Canada [9], rainbow trout (*Oncorhynchus mykiss*) in Australia  
67 [8], sole (*Solea senegalensis*) and turbot (*Scophthalmus maximus*) in Spain [10], sea bass  
68 (*Dicentrarchus labrax*) in Europe [11], Japanese flounder (*Paralichthys olivaceus*) in Japan [12], and

69 black damselfish (*Neoglyphieodon melas*) and Picasso triggerfish (*Rhinecanthus assasi*) in Egypt [13].  
70 Although other *T. maritimum* isolates have also been retrieved from outbreaks in other countries and  
71 host fish species, pathogenicity has not been confirmed using experimental challenges in any of these  
72 examples [14,15].

73 The aims of the present study were to investigate the recurrent and acute outbreaks occurring in *Platax*  
74 *orbicularis* farms in French Polynesia, to characterize the causative agent using bacteriological,  
75 histological and molecular analyses and then to conduct experimental challenges to confirm this  
76 causality, thus fulfilling Koch's postulates.

## 77 **2 Materials and methods**

### 78 **2.1 Ethic statement**

79 In the absence of *ad hoc* ethical committees in French Polynesia, *in vivo* experiments reported in the  
80 present study fulfill all the sections of deliberation no 2001-16 APF from the Assembly of French  
81 Polynesia issued in the Journal Officiel de Polynésie française on the 1st February 2001, dealing on  
82 domestic or wild animal welfare. Nevertheless, we used several guidelines in the present study and  
83 followed animal care and ethic guidelines (16,17). In particular, fish were euthanized using an  
84 overdose of Benzocaine (150 mg L<sup>-1</sup> stock solution prepared in ethanol). This method of euthanasia,  
85 reproducible and safe to the operator, induces a depression of the central nervous system activity, rapid  
86 unconsciousness and death of *P. orbicularis*, without compromising further microbiological and  
87 histological analyses. The criterion used to exercise humane endpoint was that moribund fish  
88 displaying the typical sign of white-patch disease had lost their ability to maintain an upright position  
89 in the tanks and were not evasive to netting. During all experiments of this study, fish were monitored  
90 by trained fish health specialists to make sure that the ethical aspects were secured.

## 91 2.2 Sampling of diseased fish

92 Ten symptomatic orbicular batfish (mean weight 5.1 +/- 2.3 g) were recovered from two different  
93 farms located in Tahiti island. They were sampled during two severe outbreaks in 2013 and 2016 that  
94 had caused >50% cumulative mortality just 2 weeks after the fish had been transferred from the VAIA  
95 hatchery to net cages in the Tahiti lagoon. All fish showed erosion and ulceration of the skin surface.  
96 After being euthanized with an overdose of Benzocaine (150 mg L<sup>-1</sup>), they were examined by  
97 microscopy and microbiological and histological techniques.

## 98 2.3 Direct microscopic examination and isolation of bacteria

99 Skin lesion scrapings from moribund batfish were collected using sterile surgical scalpels. Wet mount  
100 preparations were then examined under a light microscope (Leica DM 1000 LED). For each bacterial  
101 isolation, a sterile swab cotton-tipped applicator (COPAN) was used. Smears of skin samples were  
102 deposited onto plates of *Flavobacteriaceae*-selective marine agar (FSMA) developed by an accredited  
103 veterinary diagnostic laboratory (Labofarm, Loudéac, France). A total of ten dominant bacterial strains  
104 were isolated after sub-culture (Table 1).

105 **Table 1. List of bacterial strains retrieved from farmed *Platax orbicularis* affected by white-**  
106 **patch disease, with their sources and characteristics.** Virulence was evaluated by experimental bath  
107 challenge on *T. maritimum*-free batfish. Significant differences (p<0.05) in mortality rate (see  
108 paragraph 3-3) between non-infected and infected fish are indicated by 'yes' or 'no'. Isolate  
109 identification was performed using EzBioCloud software [18], based on >99% identity of their 16S  
110 rRNA sequences with the closest type strain. ST refers to the MLST sequence type. n/a: not analysed.

111

| Strains  | Source and date of isolation               | GPS location                | 16S rDNA GenBank accession number | Bacterial species    | Virulence | ST    |
|----------|--------------------------------------------|-----------------------------|-----------------------------------|----------------------|-----------|-------|
| TFA4     | Skin lesions, Tautira lagoon, Tahiti, 2013 | 17°47'50'' S, 149°07'14'' W | MW690171                          | <i>T. maritimum</i>  | yes       | ST168 |
| Aq 9-66  | Skin lesions, Tautira lagoon, Tahiti, 2013 | 17°47'50'' S, 149°07'14'' W | MW690177                          | <i>T. mesophilum</i> | no        |       |
| Aq 9-67  | Skin lesions, Tautira lagoon, Tahiti, 2013 | 17°47'50'' S, 149°07'14'' W | MW690178                          | <i>T. mesophilum</i> | no        |       |
| Aq 16-83 | Skin lesions, Vairao lagoon, Tahiti, 2016  | 17°48'22'' S, 149°17'36'' W | MW690172                          | <i>T. maritimum</i>  | n/a       | n/a   |
| Aq 16-84 | Skin lesions, Vairao lagoon, Tahiti, 2016  | 17°48'22'' S, 149°17'36'' W | MW690173                          | <i>T. maritimum</i>  | yes       | n/a   |

|          |                                           |                             |          |                      |     |       |
|----------|-------------------------------------------|-----------------------------|----------|----------------------|-----|-------|
| Aq 16-85 | Skin lesions, Vairao lagoon, Tahiti, 2016 | 17°48'22'' S, 149°17'36'' W | MW690174 | <i>T. maritimum</i>  | n/a | ST167 |
| Aq 16-87 | Skin lesions, Vairao lagoon, Tahiti, 2016 | 17°48'22'' S, 149°17'36'' W | MW690175 | <i>T. maritimum</i>  | yes | n/a   |
| Aq 16-88 | Skin lesions, Vairao lagoon, Tahiti, 2016 | 17°48'22'' S, 149°17'36'' W | MW690176 | <i>T. maritimum</i>  | n/a | ST167 |
| Aq 16-89 | Skin lesions, Vairao lagoon, Tahiti, 2016 | 17°48'22'' S, 149°17'36'' W | MW690180 | <i>T. maritimum</i>  | n/a | ST167 |
| Aq 16-91 | Skin lesions, Vairao lagoon, Tahiti, 2016 | 17°48'22'' S, 149°17'36'' W | MW690179 | <i>T. mesophilum</i> | n/a |       |

112

## 113 2.4 Histopathological examination

114 Skin fragments of approximately 1 cm<sup>2</sup> were collected from four fish showing typical skin lesions of  
115 the white-patch disease using a sterile surgical scalpel. Samples were fixed in Davidson's solution  
116 (25% formaldehyde, 37.5% ethanol, 12.5% acetic acid and 25% water) for 48 hours at room  
117 temperature, then washed and kept in 70% ethanol. Skin samples were progressively dehydrated in an  
118 ascending series of alcohol (70 to 100% ethanol) followed by a xylene bath, using a dehydration  
119 automate (Leica, ASP 300S), then embedded in paraffin, cut into 3-µm sections using a rotary  
120 microtome (Microm HM 340E, Thermo Fisher Scientific) and stained with haematoxylin–eosin (H-E)  
121 using a fully-automated integrated stainer (Leica, CV5030 autostainer XL). Several sections were  
122 analysed to ensure reproducibility, using a Leica DM 1000 LED microscope equipped with a Dino-  
123 Lite camera (AnMo Electronics).

## 124 2.5 Molecular and serological studies

125 16S rDNA sequences were PCR-amplified using the universal 27F and 1492R primers (Table S1) and  
126 the purity and length of the amplicons were verified by agarose gel electrophoresis. Amplicons were  
127 Sanger sequenced by GATC-biotech (<https://www.gatc-biotech.com>) using the six universal  
128 sequencing primers listed in Table S1. For each strain, the six sequences were visualized and aligned  
129 to create a consensus sequence (with > 2X coverage over 80% of the sequences) using Benchling  
130 software (2020). For primary taxonomic assignment, the 16S rRNA consensus sequences were  
131 searched against the EzBioCloud database [18] (accession numbers are given in Table S2). In addition,

132 a tentative phylogenetic tree was constructed using the MAFFT online service [19]. The evolutionary  
133 distance was calculated using 1000 bootstrap replicates (Fig S1).

134 To characterize the genetic diversity of presumptive *T. maritimum* strains in greater depth, multi-locus  
135 sequence analysis (MLSA) was performed on four selected isolates (TFA4, Aq 16-85, Aq 16-88, Aq  
136 16-89) using sequences retrieved from their draft genomes [20]. These isolates were selected  
137 according to their background information: Aq 16-85, Aq 16-88 and Aq 16-89 were sampled from  
138 three different infected fish during an outbreak at the Vairao fish farm in 2016, while strain TFA4 was  
139 isolated from a symptomatic fish at the Tautira fish farm in 2013 (Table 1). The MLSA profile defined  
140 by Habib et al. (2014) [21] consists of the sequences of seven housekeeping genes (*atpA*, *gyrB*, *dnaK*,  
141 *glyA*, *infB*, *rlmN* and *tgt*). The profiles of the new allele and sequence types (ATs and STs,  
142 respectively), were generated and analysed using the *Tenacibaculum* pubMLST database  
143 (<https://pubmlst.org/tenacibaculum/>) [22]. Results were visualized using the incremented Interactive  
144 Tree of Life (iTOL) v3 tool [23].

145 To examine the isolates identified as *T. maritimum* more closely, their serotype was determined as  
146 described by Avendaño-Herrera et al. (2004b) [24]. This method uses a slide agglutination test and a dot  
147 blot assay on both whole-cell preparations and heat stable O antigens of each strain. Antisera against  
148 serovars O1 (PC503.1), O2 (PC424.1) and O3 (ACC13.1) were used in all assays.

## 149 **2.6 Experimental infection by immersion and quantification of** 150 ***Tenacibaculum maritimum* in mucus samples by real-time qPCR**

151 A batch of *Platax orbicularis* fingerlings (mean weight 9.7 +/- 2.6 g) reared at the VAIA bio-secured  
152 hatchery was transferred for acclimatization to a 1-m<sup>3</sup> fibreglass tank containing seawater (salinity, 32  
153 PPT; water temperature of 26–27°C) for 10 days. Prior to infection, 494 fish were randomly selected  
154 and transferred to nine 150-L tanks (50 fish per tank) filled with 5-µm filtered seawater. Three groups  
155 were tested in triplicate: (i) non-infected fish (NIF), (ii) fish infected with *T. maritimum* strain TFA4  
156 (IF) and (iii) fish with impaired mucus (IM) infected with *T. maritimum* strain TFA4 (IM-IF). The

157 mucus of the latter fish was partially removed by gently wiping one side of the fish with a sponge  
158 soaked in filtered seawater. Fish were challenged with a pure culture of strain TFA4 obtained by  
159 incubation at 27°C for 48 h (stationary phase) in autoclaved nutrient broth composed of 4 g L<sup>-1</sup>  
160 peptone and 1 g L<sup>-1</sup> yeast extract (Becton, Dickinson and Co., Sparks, MD, USA) in 5µm-filtered  
161 seawater under orbital shaking at 200 rpm. Bath challenges were performed for two hours with strain  
162 TFA4 at a final concentration of 5.3 10<sup>4</sup> CFU mL<sup>-1</sup> for groups IF and IM-IF or with nutrient broth in  
163 the case of the mock-treated NIF control group. The infected fish were then rinsed twice with filtered  
164 seawater to remove all non-adherent bacteria, and fish from the NIF control group were manipulated  
165 in the same way. Mortality was monitored twice daily from day 0 (D0) until day 5 (D5) at which point  
166 the fish were euthanized using 150 mg L<sup>-1</sup> Benzocaine. Any fish that died or were found moribund  
167 over the experimental period (D0–D5) were promptly removed from the tanks during the monitoring.  
168 The non-parametric Kaplan–Meier method (R package *survival*) was used to test for differential  
169 survival performances among groups at the same date or within groups throughout the sampling  
170 period. Differences were considered significant at  $P < 0.05$ .

171 At 24 h post-infection, before the onset of mortality, four fish displaying skin lesions were randomly  
172 sampled from the two infected groups (IF and IM-IF) in addition to four fish from the NIF group.  
173 These were used to quantify *T. maritimum* cells in fish mucus using TAQMAN real time PCR (see  
174 primers and probe in suppl. Table 1) following the protocol developed by Fringuelli et al. (2012) [23]  
175 with minor modifications. Briefly, skin mucus samples were obtained from lesions on symptomatic  
176 fish using cotton swabs (COPAN), directly diluted in 1.5-mL micro-centrifuge tubes containing 0.5  
177 mL of lysis solution (0.1 M EDTA pH 8; 1 % SDS and 200 µg ml<sup>-1</sup> proteinase K) and incubated  
178 overnight at 55°C. DNA was extracted using the conventional phenol/chloroform/isoamyl alcohol  
179 (25/24/1) method. DNA quantity and purity were assessed using a NanoDrop ND 1000  
180 spectrophotometer (Thermo Fisher Scientific). In order to obtain a standard curve, bacterial cells of  
181 strain TFA4 from a stationary phase culture in nutrient broth were enumerated using a Malassez  
182 counting chamber (2.35 10<sup>8</sup> bacteria ml<sup>-1</sup>) and DNA from 1 ml of the bacterial suspension was  
183 extracted. The DNA was then spiked at a final concentration of 1.33 ng µl<sup>-1</sup> in salmon sperm gDNA



184 (SSD, Thermo Fisher) at 10 ng  $\mu\text{l}^{-1}$  in artificial seawater (ASW, Sigma), then serially diluted 10-fold  
185 in SSD at 10 ng  $\mu\text{l}^{-1}$  in ASW. A linear range of values was obtained for PCR amplification on a  
186 Mx3000 Thermocycler (Agilent) using Brilliant III Ultra-Fast QPCR Master Mix (Agilent) following  
187 the supplier's recommendations (5  $\mu\text{l}$  DNA at 10 ng  $\mu\text{l}^{-1}$  in a total reaction volume of 20  $\mu\text{l}$ ), with six  
188 successive sample 10-fold dilutions tested in triplicate. Cycle threshold (Ct) values ranged from 16.05  
189 to 33.14, corresponding to  $1.44 \times 10^5$  to  $2.06 \times 10^1$  cells of strain TFA4 per PCR well, while correlation  
190 (linear regression with  $r^2$  coefficient) and qPCR reaction efficacy were 0.995 and 99.9%, respectively.

## 191 **2.7 Detection and quantification of *Tenacibaculum maritimum*** 192 **during a field episode of tenacibaculosis**

193 Juvenile batfish (mean weight 10 +/- 3.3 g) reared in the bio-secured facilities of the VAIA hatchery  
194 were carefully transferred (D0) to the Tahiti Fish Aquaculture farm in Tautira lagoon and kept in a  
195 single net cage of 1  $\text{m}^3$  (167 fish/ $\text{m}^3$  density). Ten fish were collected at five sampling times: day 6  
196 before transfer (D-6) (i.e. in the VAIA hatchery) and D1, D9, D17 and D36 post-transfer to Tautira  
197 lagoon. When gross signs of the white-patch disease were observed, five moribund fish (symptomatic)  
198 and five apparently healthy ones (asymptomatic) were sampled. These fish were euthanized as detailed  
199 above and the liver, posterior intestine and some skin mucus (collected with a cotton swab in the  
200 lesion area in the case of symptomatic fish) were individually and aseptically sampled and preserved  
201 in 500  $\mu\text{l}$  RNAlater (Ambion) at  $-80^\circ\text{C}$ . Approximately 100 mg of tissue were used to quantify *T.*  
202 *maritimum* by qPCR [23]. Throughout this survey, no curative treatments were given, mortality was  
203 monitored daily and moribund animals (euthanized with an overdose of benzocaine) or dead fish  
204 were removed and discarded.

## 205 **3 Results**

### 206 **3.1 Microscopic examination and isolation of bacteria**

207 Two severe white-patch disease outbreaks, occurring within the first 2 months following transfer to  
208 net cages in a lagoon, were recorded in 2013 and 2016. These outbreaks occurred in two  
209 geographically distinct fish farming areas of Tahiti island (Tautira lagoon: 17°47'50'' S, 149°07'14''  
210 W, and Vairao lagoon: 17°48'22'' S, 149°17'36'' W) with cumulative mortality reaching 80% and  
211 62%, respectively. The main clinical signs were loss of appetite, erratic swimming and ulcerative skin  
212 lesions (Fig 1A). Wet mount examination of the skin mucus of diseased batfish revealed a significant  
213 amount of long (6.3 +/- 0.6 µm) and rod-shaped bacteria (Fig 1B).

214 **Fig 1. Examination of fish lesions.** A) Gross clinical signs of the white-patch disease of batfish  
215 characterized by: (i) circular discoloration areas of various sizes, apparently randomly distributed on  
216 the skin surface; (ii) skin lesions, ulcers, scale loss (white arrow) and areas of haemorrhagic necrosis  
217 (red arrow); and (iii) frayed (usually caudal) fins (black arrow). B) Microscopic examination of skin  
218 lesions reveals abundant, long, slender, rod-shaped bacteria. Numerous bacteria remain adhered to the  
219 fish scales (white arrows) while others detached after the fragment of lesion was crushed. C) View of  
220 the skin surface at the interface between apparently healthy and damaged zones. D) An apparently  
221 healthy zone observed under a surgical Q-Scope microscope (AnMo Electronics).

222

223 Histopathological examination of skin lesions from moribund batfish revealed that the epidermis and  
224 dermis were severely damaged, with clusters of filamentous, *Tenacibaculum*-like bacteria and  
225 scattered inflammatory cells (Fig 2). In contrast, no evidence of histopathological changes was noticed  
226 in the internal organs.

227 **Fig 2. Two representative cross sections (H-E staining) of *Platax orbicularis* fingerlings affected**  
228 **by white-patch disease.** A1 and B1: Severe necrosis affecting the hypodermis and dermis layers with  
229 invasion of *Tenacibaculum* cells (arrows) visible at a higher magnification (A2 and B2) and detection  
230 of inflammatory cells in damaged areas (asterisks).

231

232 Ten strains were isolated from samples of 10 moribund batfish exhibiting the typical signs of white-  
233 patch disease using *Flavobacteriaceae*-selective marine agar (Table 1). Two different colony

234 morphotypes were observed after 48 h of incubation at 27°C: the first morphotype consisted of pale,  
235 translucent colonies with uneven edges, extremely adherent to the agar (Fig 3A), while the second  
236 morphotype consisted of orange, opaque, diffuse and strongly iridescent colonies (Fig 3B, C).

237 **Fig 3. Representative strains isolated from symptomatic *Platax orbicularis*.** A) colonies of  
238 *Tenacibaculum maritimum*, strain TFA4. B) and C) colonies of *Tenacibaculum mesophilum*, strain Aq  
239 16-91, with different camera shooting angles revealing the iridescent phenotype.

## 240 **3.2 Genomic and serological characterization**

241 Analysis of nearly complete 16S rRNA sequences revealed that all isolates belonged to the genus  
242 *Tenacibaculum*. Seven strains (TFA4, Aq 16-83, Aq 16-84, Aq 16-85, Aq 16-87, Aq 16-88 and Aq 16-  
243 89) shared 99.65% to 99.79% sequence identity with the *T. maritimum* type strain NBRC 15946<sup>T</sup>, with  
244 at least 98,9% coverage. The three remaining strains (Aq 9-66, Aq 9-67 and Aq 16-91) displayed  
245 99.37 to 99.93% sequence identity with the *T. mesophilum* type strain DSM 13764<sup>T</sup>, with at least  
246 98,9% coverage. A tentative phylogenetic tree was drawn using MAFFT (Fig S1). The seven strains  
247 displaying the first morphotype clustered with the *T. maritimum* type strain, while the three strains  
248 belonging to the second morphotype clustered with the *T. mesophilum* type strain; bootstrap values  
249 were 100% and 91%, respectively.

250 The results of the MLSA analysis (Fig 4) performed on *T. maritimum* strains TFA4, Aq 16-85, Aq 16-  
251 88 and Aq 16-89 showed that none matched exactly with any of the sequence types (ST) already  
252 described in the pubMLST database. They were therefore treated as belonging to new STs: ST168,  
253 which was attributed to strain TFA4; and ST167, which was attributed to strains Aq 16-85, Aq 16-88  
254 and Aq 16-89. Analysis of the number of locus variants revealed that these novel STs only share three  
255 allele types (AT), corresponding to loci *gyrB*, *infB* and *rlmN*, which reveal genetic heterogeneity  
256 among these two groups of isolates. The single and double locus variant analyses (SLV and DLV)  
257 were fairly congruent with the phylogenetic tree based on the concatenated nucleotide sequences of  
258 the seven housekeeping genes (Fig 4). SLV analysis showed that ST168 (TFA4) shares 6/7 loci with  
259 ST2, which up to now only included strain ACC13.1 (referenced as 002 in the pubMLST database),

260 isolated from a diseased Senegalese sole (*Solea senegalensis*) in Portugal. In the DLV, TFA4 shared  
261 5/7 loci with ST3, 4, 10, 35, 36, and 130, which essentially comprise isolates from the south of Europe  
262 (except for strain 4646, isolated in Australia). Interestingly, strains Aq 16-85, Aq 16-88 and Aq 16-89  
263 (ST167) formed a singleton, meaning that they displayed at least three different ATs compared with  
264 all the strains included in the pubMLST database. These results revealed the existence of at least two  
265 genetically distinct groups of *T. maritimum* isolates in Tahitian fish farms.

266 **Fig 4. Genomic and background information on all *T. maritimum* isolates in the pubMLST**  
267 **database.** Strains isolated in this study are shown in red type. Neighbor-joining tree based on the  
268 concatenated nucleotide sequences of the 7 housekeeping genes (3894 bp). Other information: strain  
269 number, strain name, country of isolation, fish host species, year of isolation, sequence type, and its  
270 allelic combination.

271  
272 Serological analysis revealed two different serogroups among the *T. maritimum* strains. Slide  
273 agglutination tests showed that strain TFA4 specifically reacted with the anti-O3 antiserum, while  
274 strains Aq 16-85, Aq 16-88 and Aq 16-89 specifically reacted with the anti-O1 antiserum.

### 275 **3.3 Pathogenicity assays using an immersion challenge**

276 All batfish that were experimentally infected with *T. maritimum* TFA4 using the immersion challenge  
277 (IF group) exhibited typical clinical signs of white-patch disease starting from 24 h post-infection (PI),  
278 although no mortality was recorded at this time point (Fig 5). At 30 h PI, fish in this group underwent  
279 significant (chi-squared-test with simulated p-value correction,  $P = 0.017$ ) mortality, with a survival  
280 probability of 94.9% compared with 100% (no death events) in the non-infected fish group (NIF). A  
281 sudden mortality event was observed in the IF group between 30 and 48 h PI, with 94.9% and 25%  
282 survival probabilities, respectively. From 82 h until the end of the monitoring period (120 h PI), no  
283 increase in mortality was observed (7.1% survival probability for the IF group at 72 h PI to 120 h PI)  
284 even though all batfish displayed typical clinical signs of the disease. Nevertheless, the intensity of  
285 ulcerative skin lesions (i.e. the number and area of whitish patches) in the IF group from 72 h to 120 h  
286 PI was lower than that observed before 72 h PI (data not shown). In the IM-IF group, not only did  
287 batfish experience the highest mortality rate because all fish died, giving a survival probability of 0%

288 from 30h PI, but they also died significantly earlier than those of the IF group with intact skin mucus  
289 (log-rank test comparing the survival curves from 0 h PI to 30 h PI,  $P = 0.02$ ). No mortality was  
290 recorded in the NIF control group during the entire trial.

291 **Fig 5 Survival curves of bath-challenged batfish *Platax orbicularis*.** NIF, non-infected fish; IF, fish  
292 infected with  $5.3 \times 10^4$  CFU mL<sup>-1</sup> of strain TFA4 for 2 hours; IM-IF, infected fish from which mucus  
293 had been partially removed before the bath challenge.

294

295 All skin samples that were collected from diseased fish in the IF group before the onset of mortality  
296 were found positive by real time PCR assay, with an average load of  $7.8 \times 10^8 \pm 1.4 \times 10^8$  *T. maritimum*  
297 bacteria per  $\mu\text{g}$  of total extracted DNA. In contrast, no *T. maritimum* was detected in any of the four  
298 analysed skin samples in the NIF group. The virulence potential of two (Aq 16-84 and Aq 16-87) and  
299 three (Aq 9-65, Aq 9-66 and Aq 9-67) strains belonging to the species *T. maritimum* and *T.*  
300 *mesophilum*, respectively, was also evaluated using the same immersion challenge protocol. Results of  
301 this separate trial showed that the two *T. maritimum* strains exhibited levels of virulence similar to that  
302 of strain TFA4, whereas the three *T. mesophilum* strains were avirulent at a similar infection dose  
303 ( $6.1 \times 10^4$  CFU mL<sup>-1</sup>), with no mortality recorded in the groups IF and NIF during a seven-day post-  
304 infection survey (data not shown).

### 305 **3.4 Kinetics of *Tenacibaculum maritimum* infection during a field** 306 **episode of tenacibaculosis**

307 To gain insight into *T. maritimum* pathogenesis under natural field conditions, a batch of batfish was  
308 monitored from its production under bio-secured conditions at the VAIA hatchery to its rearing in a  
309 net cage on a private farm in Tautira lagoon. Soon after the transfer to the net cage in the lagoon, a  
310 severe outbreak of white-patch disease was observed, with the first typical signs appearing from D1  
311 post-transfer and mortality from D3 (Fig 6).

312 **Fig 6. Cumulative mortalities of a batch of batfish during a natural outbreak following their**  
313 **transfer to a net cage in Tautira lagoon.** Fish were 10 g (mean weight) and reared at an initial  
314 density (D0) of 167 fish/m<sup>3</sup>.

315

316 Two peaks of mortality occurred, at D3–D6 and D13–D31. The second peak was higher, with  
317 cumulative mortalities increasing significantly from 11.2% at D13 to 74.5% at D31. No subsequent  
318 mortality then occurred among the surviving batfish until the end of the study period (D36).

319 Six days before the transfer to the lagoon cage (D-6) all sampled fish were qPCR negative for *T.*  
320 *maritimum* (Fig 7).

321

322 **Fig 7. Kinetics of *Tenacibaculum maritimum* bacterial cells quantified by qPCR in the mucus of**  
323 **asymptomatic (white boxes) and symptomatic (grey boxes) batfish from D-6 (at VAIA hatchery)**  
324 **to D36 post transfer to net cage in the lagoon.** Quantification results are expressed in numbers of *T.*  
325 *maritimum* cells per  $\mu\text{g}$  of total extracted gDNA. Because zero values (no detection) cannot be  
326 represented on a logarithmic scale, an arbitrary value of 1.1 was assigned to these negative results.  
327 Each box-plot shows mean (white circle), the 25th to 75th percentile (rectangular box), the minimum  
328 and maximum values (dots at the extremities), as well as individual quantification (black dots) from 5  
329 to 10 batfish per sampling time and group of batfish.

330

331 In contrast, the mucus of all batfish sampled just one day (D1) after the transfer to the lagoon net cages  
332 was found positive for *T. maritimum* by qPCR, although very different bacterial loads (mean values,  
333  $9.98 \cdot 10^6 \pm 1.57 \cdot 10^7$  cells per  $\mu\text{g}$  DNA) were observed. At D9, during the first stationary phase of  
334 mortality (D6–D13), asymptomatic batfish showed significantly lower bacterial loads in their mucus  
335 compared with D1 (Kruskal Wallis test;  $p = 0.020$ ). Nevertheless, the amount of *T. maritimum* at D9  
336 was significantly higher ( $p = 0.047$ ) in batfish exhibiting clinical signs of tenacibaculosis compared  
337 with asymptomatic fish. During the second peak of mortality, the discrepancy between asymptomatic  
338 and symptomatic batfish was even more pronounced ( $p = 0.016$ ). At the end of the mortality events  
339 (D36), *T. maritimum* DNA was absent from most sampled surviving fish (8/10). Indeed, only two  
340 asymptomatic batfish among the 10 tested were found positive by qPCR but at very low levels ( $8.36$   
341  $10^2 \pm 6.02 \cdot 10^2$  cells per  $\mu\text{g}$  DNA), signalling the end of the outbreak.

342 qPCR results on the liver of the same batfish sampled for their mucus revealed that only one fish  
343 among the 50 tested, sampled at D1, was positive for *T. maritimum* at a low level ( $1.19 \cdot 10^4$  cells per

344  $\mu\text{g}$  gDNA). Similar results were obtained with the posterior intestine: only seven batfish were found  
345 qPCR positive, with the low value of  $1.11 \cdot 10^4 \pm 1.37 \cdot 10^4$  cells per  $\mu\text{g}$  gDNA (data not shown).

## 346 **4 Discussion**

347 Orbicular batfish aquaculture in French Polynesia started in 2004 and the first symptoms of white-  
348 patch disease were observed in 2006. In this study, we showed that the white-patch disease decimating  
349 farmed *Platax orbicularis* is associated with *T. maritimum* infection. To our knowledge, this is the first  
350 time that this bacterium has been isolated in French Polynesia, and also the first time it has been  
351 retrieved from batfish. *T. maritimum* has been associated with a large variety of marine fish species:  
352 38 according to Nowlan et al. (2020) [5], including the orbicular batfish (this study). Surprisingly,  
353 *Platax orbicularis* is the only tropical fish in which this pathogen has been reported so far.  
354 Nevertheless, the range of susceptible hosts for this bacterium is probably underestimated. In French  
355 Polynesia, tenacibaculosis has dramatic consequences for batfish farms, which often suffer mortality  
356 levels over 50%. In addition, the disease may also be of serious concern regarding the diversification  
357 of aquaculture programs launched by local authorities.

358 In this study, we described a reproducible bath challenge protocol that demonstrated that *T. maritimum*  
359 is able to infect orbicular batfish by immersion, thus fulfilling Koch's postulates. Experimental  
360 infection procedures using immersion challenges have been broadly used with fish pathogens in recent  
361 years because they are likely to mimic the natural infection process more accurately than injection  
362 challenges. In particular, immersion does not bypass the first line of fish defence (i.e. the skin mucus  
363 barrier), unlike the more common subcutaneous, intraperitoneal and intramuscular injection routes. It  
364 has also been reported that, compared with immersion, some injection challenges fail to induce  
365 tenacibaculosis [11,26–28] or can lead to high mortality rates in negative controls due to stress and  
366 local lesions caused by the injection [29]. However, comparative analyses of challenge protocols are  
367 rather difficult to perform due to the many factors reported to influence pathogenicity, such as the  
368 bacterial strain [9,27,28], culture conditions (i.e. growth medium and temperature), infection dose



369 [12,26], duration of immersion [30], physical [27] and chemical characteristics of seawater,  
370 zootechnical practices (e.g. fish density and animal feed), and the host fish species [8], physiological  
371 status (e.g. age [27]) and genetic background (e.g. susceptible, resistant). In this study, no significant  
372 difference in mortality rates was observed when batfish were infected with strains TFA4, Aq 16-87, or  
373 Aq 16-84, although these strains differed in some genetic traits. However, due to the high virulence of  
374 these strains in our immersion challenge model, further studies using a lower dose or shorter  
375 immersion time might reveal virulence differences between these strains. Although physical alteration  
376 of the fish skin was not necessarily seen before morbidity and mortality, batfish with impaired mucus  
377 developed clinical signs more rapidly and experienced higher mortality rates (100% mortality at 23 h  
378 post infection) than those which mucus was intact. These results are in agreement with similar studies  
379 performed on other fish species [11,30]. Indeed, mucus has been largely documented as an important  
380 component of the fish innate immune system and a physical and chemical barrier against pathogens  
381 [31].

382 Some of the isolates from diseased batfish were shown to belong to another *Tenacibaculum* species, *T.*  
383 *mesophilum*, a bacterium initially reported in a marine sponge. In addition, *T. mesophilum* strain  
384 HMG1 was shown to degrade malachite green, an antimicrobial that has long been used in aquaculture  
385 but now banned in many countries [32]. Immersion challenges performed with strains Aq 9-66 and Aq  
386 9-67 showed that both strains were totally avirulent. Further studies would be needed, however, to  
387 determine whether *T. mesophilum* strains can play a role in the pathogenesis of tenacibaculosis,  
388 primarily caused by *T. maritimum*, by acting as secondary colonizers of the lesions.

389 Although this study was conducted with only 10 isolates, an unexpected diversity of *T. maritimum*  
390 isolates was found. Our results demonstrate the presence of two distinct groups: strains Aq 16-85, Aq  
391 16-88 and Aq 16-89, belonging to serotype O1 and to sequence type ST167; and strain TFA4,  
392 belonging to serotype O3 and to sequence type ST168. Such a diversity among *T. maritimum* isolates  
393 was also noticed among the Australian isolates (Fig 4). In agreement with Van Gelderen et al. (2010)  
394 [33], no correlation between serotype and geographic distribution was observed in the present study.



395 Additional work is needed to make a deeper exploration of the genetic diversity of *Tenacibaculum*  
396 strains associated with batfish in French Polynesia in order to evaluate their virulence potential and  
397 develop management and disease control strategies. Because the natural ecology of *T. maritimum* is  
398 still unknown, more in-depth epidemiological studies will also be necessary to decipher the mode of  
399 transmission and the natural route of infection of this pathogen.

## 400 **Acknowledgements**

401 The authors are indebted to Dr Alicia Estévez Toranzo (Universidad de Santiago de Compostela,  
402 Spain) for serotyping the *T. maritimum* batfish isolates. We are also grateful to Sylvain Dupieux and  
403 Eddy Laille of Tahiti Fish Aquaculture company, Edouard Lehartel from Tautira Aquaculture  
404 company, and Benoît Le Marechal, Director of Cooperative des Aquaculteurs de Polynésie française  
405 (CAPF) as well as his colleagues Wallen Teiri, Heifara Wallon and Sylvain Dupieux, who provided us  
406 with the experimental fish used in this study. This work was supported by IFREMER and the  
407 Direction des Ressources Marines through "Aqua-Sana 1 and Aqua-Sana2" collaborative projects  
408 (2016–2021) and by the Ministère de l'Economie Verte et du Domaine en charge des Mines et de la  
409 Recherche de Polynésie Française through « Tenacifight » project (2020-2022). P. Lopez was granted  
410 an IFREMER-DRM scholarship. We would also like to thank the Bureau de Traduction de  
411 l'Université, UBO, Brest, for revising the English of the manuscript.

## 412 **References**

- 413 1. Nakabo T. Fishes of the Japan: with pictorial keys to the species, English edition. Tokyo: Tokai  
414 University Press; 2002, p 1749.
- 415 2. Barros B, Sakai Y, Hashimoto H, Gushima K. Feeding behavior of leaf-like juveniles of the  
416 round batfish *Platax orbicularis* (*Ephippidae*) on reefs of Kuchierabu-jima Island, southern  
417 Japan. J Ethol. 2008; 26(2):287–93.

- 418 3. Andréfouët S, Adjeroud M. French Polynesia. In: World Seas: an Environmental Evaluation  
419 [Internet]. Elsevier; 2019 [cited 2020 Apr 26]. p. 827–54. Available from:  
420 <https://linkinghub.elsevier.com/retrieve/pii/B9780081008539000397>
- 421 4. Suzuki M, Nakagawa Y, Harayama S, Yamamoto S. Phylogenetic analysis and taxonomic study  
422 of marine *Cytophaga*-like bacteria: proposal for *Tenacibaculum* gen. nov. with *Tenacibaculum*  
423 *maritimum* comb. nov. and *Tenacibaculum ovololyticum* comb. nov., and description of  
424 *Tenacibaculum mesophilum* sp. nov. and *Tenacibaculum amylolyticum* sp. nov. Int J Syst Evol  
425 Microbiol. 2001; 51(5):1639–52.
- 426 5. Nowlan JP, Lumsden JS, Russell S. Advancements in Characterizing *Tenacibaculum* Infections  
427 in Canada. Pathogens. 2020; 9(12):1029.
- 428 6. Masumura K, Wakabayashi H. An outbreak of gliding bacterial disease in hatchery-born red  
429 seabream (*Pagrus major*) and gilthead (*Acanthopagrus schlegeli*) fry in Hiroshima [Japan]. Int J  
430 Syst Bacteriol [Internet]. 1977 [cited 2020 Jan 22]; Available from: [http://agris.fao.org/agris-](http://agris.fao.org/agris-search/search.do?recordID=JP19780304773)  
431 [search/search.do?recordID=JP19780304773](http://agris.fao.org/agris-search/search.do?recordID=JP19780304773)
- 432 7. Wakabayashi H, Hikida M, Masumura K. *Flexibacter maritimus* sp. nov., a pathogen of marine  
433 fishes. Int J Syst Bacteriol. 1986; 36(3):396–8.
- 434 8. Handler J, Soltani M, Percival S. The pathology of *Flexibacter maritimus* in aquaculture  
435 species in Tasmania, Australia. J Fish Dis. 1997; 20(3):159–68.
- 436 9. Frisch K, Småge SB, Johansen R, Duesund H, Brevik ØJ, Nylund A. Pathology of  
437 experimentally induced mouthrot caused by *Tenacibaculum maritimum* in Atlantic salmon  
438 smolts. Boudinot P, editor. PLOS ONE. 2018; 13(11):e0206951.
- 439 10. Mabrok M, Machado M, Serra CR, Afonso A, Valente LMP, Costas B. Tenacibaculosis  
440 induction in the Senegalese sole (*Solea senegalensis*) and studies of *Tenacibaculum maritimum*  
441 survival against host mucus and plasma. J Fish Dis. 2016; 39(12):1445–55.
- 442 11. Bernardet J-F, Kerouault B, Michel C. Comparative study on *Flexibacter maritimus* strains  
443 isolated from farmed sea bass (*Dicentrarchus labrax*) in France. Fish Pathol. 1994; 29(2):105–  
444 11.

- 445 12. Nishioka T, Watanabe K, Sano M. A bath challenge method with *Tenacibaculum maritimum* for  
446 Japanese flounder *Paralichthys olivaceus*. *Fish Pathol.* 2009; 44(4):178–81.
- 447 13. Mahmoud Hasheim MH. Pathological findings of *Tenacibaculum maritimum* infection in black  
448 damselfish, *Neoglyphieodon melas* and Picasso triggerfish, *Rhinecanthus assasi* in Red Sea,  
449 Egypt. *J Vet Sci Technol* [Internet]. 2014 [cited 2020 Dec 18];06(02). Available from:  
450 [https://www.omicsonline.org/open-access/pathological-findings-of-tenacibaculum-maritimum-](https://www.omicsonline.org/open-access/pathological-findings-of-tenacibaculum-maritimum-infection-in-black-damselfish-neoglyphieodon-melas-and-picasso-triggerfish-rhinecanthus-assasi-in-red-sea-egypt-2157-7579.1000214.php?aid=40752)  
451 [infection-in-black-damselfish-neoglyphieodon-melas-and-picasso-triggerfish-rhinecanthus-](https://www.omicsonline.org/open-access/pathological-findings-of-tenacibaculum-maritimum-infection-in-black-damselfish-neoglyphieodon-melas-and-picasso-triggerfish-rhinecanthus-assasi-in-red-sea-egypt-2157-7579.1000214.php?aid=40752)  
452 [assasi-in-red-sea-egypt-2157-7579.1000214.php?aid=40752](https://www.omicsonline.org/open-access/pathological-findings-of-tenacibaculum-maritimum-infection-in-black-damselfish-neoglyphieodon-melas-and-picasso-triggerfish-rhinecanthus-assasi-in-red-sea-egypt-2157-7579.1000214.php?aid=40752)
- 453 14. Apablaza P, Frisch K, Brevik ØJ, Småge SB, Vallestad C, Duesund H, et al. Primary Isolation  
454 and Characterization of *Tenacibaculum maritimum* from Chilean Atlantic Salmon Mortalities  
455 Associated with a *Pseudochattonella* spp. Algal Bloom. *J Aquat Anim Health.* 2017; 29(3):143–  
456 9.
- 457 15. Småge SB, Frisch K, Brevik ØJ, Watanabe K, Nylund A. First isolation, identification and  
458 characterisation of *Tenacibaculum maritimum* in Norway, isolated from diseased farmed sea lice  
459 cleaner fish *Cyclopterus lumpus* L. *Aquaculture.* 2016; 464:178–84.
- 460 16. Barker D, Allan GL, Rowland SJ, Pickles JM. A Guide to Acceptable Procedures and Practices  
461 for Aquaculture and Fisheries Research. 3rd ed. Nelson Bay: Primary Industries (Fisheries)  
462 Animal Care and Ethics Committee; 2009. 52 p.
- 463 17. Kilkenny C, Browne WJ, Cuthill IC, Emerson M, Altman DG. Improving Bioscience Research  
464 Reporting: The ARRIVE Guidelines for Reporting Animal Research. *PLoS Biol.* 2010 Jun  
465 29;8(6):e1000412.
- 466 18. Yoon S-H, Ha S-M, Kwon S, Lim J, Kim Y, Seo H, et al. Introducing EzBioCloud: a  
467 taxonomically united database of 16S rRNA gene sequences and whole-genome assemblies. *Int J*  
468 *Syst Evol Microbiol.* 2017; 67(5):1613–7.
- 469 19. Katoh K, Rozewicki J, Yamada KD. MAFFT online service: multiple sequence alignment,  
470 interactive sequence choice and visualization. *Brief Bioinform.* 2019; 20(4):1160–6.

- 471 20. Pérez-Pascual D, Lunazzi A, Magdelenat G, Rouy Z, Roulet A, Lopez-Roques C, et al. The  
472 complete genome sequence of the fish pathogen *Tenacibaculum maritimum* provides insights  
473 into virulence mechanisms. *Front Microbiol.* 2017; 8:1542.
- 474 21. Habib C, Houel A, Lunazzi A, Bernardet J-F, Olsen AB, Nilsen H, et al. Multilocus sequence  
475 analysis of the marine bacterial genus *Tenacibaculum* suggests parallel evolution of fish  
476 pathogenicity and endemic colonization of aquaculture systems. Lovell CR, editor. *Appl Environ*  
477 *Microbiol.* 2014; 80(17):5503–14.
- 478 22. Jolley KA, Maiden MC. BIGSdb: Scalable analysis of bacterial genome variation at the  
479 population level. *BMC Bioinformatics.* 2010; 11(1):595.
- 480 23. Letunic I, Bork P. Interactive tree of life (iTOL) v3: an online tool for the display and annotation  
481 of phylogenetic and other trees. *Nucleic Acids Res.* 2016; 44(W1):W242–5.
- 482 24. Avendaño-Herrera R, Magariños B, López-Romalde S, Romalde J, Toranzo A. Phenotypic  
483 characterization and description of two major O-serotypes in *Tenacibaculum maritimum* strains  
484 from marine fishes. *Dis Aquat Organ.* 2004; 58(1):1–8.
- 485 25. Fringuelli E, Savage PD, Gordon A, Baxter EJ, Rodger HD, Graham DA. Development of a  
486 quantitative real-time PCR for the detection of *Tenacibaculum maritimum* and its application to  
487 field samples. *J Fish Dis.* 2012; 35(8):579–90.
- 488 26. Avendano-Herrera R, Toranzo AE, Magarinos B. A challenge model for *Tenacibaculum*  
489 *maritimum* infection in turbot, *Scophthalmus maximus* (L.). *J Fish Dis.* 2006; 29(6):371–4.
- 490 27. Yamamoto T, Kawai K, Oshima S. Evaluation of an experimental immersion infection method  
491 with *Tenacibaculum maritimum* in Japanese flounder *Paralichthys olivaceus*. *Aquaculture*  
492 *Science,* 2010; 58(4):481-489.

- 493 28. Rahman T, Suga K, Kanai K, Sugihara Y. Biological and serological characterization of a non-  
494 gliding strain of *Tenacibaculum maritimum* isolated from a diseased puffer fish *Takifugu*  
495 *rubripes*. Fish Pathol. 2014; 49(3):121–9.
- 496 29. Baxa DV, Kawai K, Kusuda R. Experimental infection of *Flexibacter maritimus* in black sea  
497 bream (*Acanthopagrus schlegeli*) fry. Fish Pathol. 1987; 22(2):105–9.
- 498 30. Frisch K, Småge SB, Vallestad C, Duesund H, Brevik ØJ, Klevan A, et al. Experimental  
499 induction of mouthrot in Atlantic salmon smolts using *Tenacibaculum maritimum* from Western  
500 Canada. J Fish Dis. 2018; 41(8):1247–58.
- 501 31. Subramanian S, MacKinnon SL, Ross NW. A comparative study on innate immune parameters  
502 in the epidermal mucus of various fish species. Comp Biochem Physiol B Biochem Mol Biol.  
503 2007; 148(3):256–63.
- 504 32. Qu W, Hong G, Zhao J. Degradation of malachite green dye by *Tenacibaculum* sp. HMG1  
505 isolated from Pacific deep-sea sediments. Acta Oceanol Sin. 2018; 37(6):104–11.
- 506 33. Van Gelderen R, Carson J, Gudkovs N, Nowak B. Physical characterisation of *Tenacibaculum*  
507 *maritimum* for vaccine development. J Appl Microbiol. 2010; 109(5):1668-76.

## 508 Supporting information

509 **S1 Fig. Phylogenetic relationships of 16S rDNA nucleotide sequences of the strains recovered in**  
510 **this study and the type strains of all *Tenacibaculum* species (See Table S2 for accession number).**  
511 The phylogenetic tree was constructed with the MAFFT online tool using the neighbor-joining (NJ)  
512 method with Jukes Cantor substitution model on all gap-free sites (1316pb) based on an alignment of  
513 32 members of the genus *Tenacibaculum* performed with the L-INS-i method. Numbers at each  
514 branch indicated the percentage bootstrap values on 1,000 replicates. The 16S rDNA sequence of  
515 *Pseudotenacibaculum haliotis* (strain FDZSB0410) was used as an outgroup.

516  
517 **S1 Table. List of PCR primers and probe used in this study.**  
518

| Name  | Target gene     | Sequence (5'-3')       | Reference                   |
|-------|-----------------|------------------------|-----------------------------|
| 27F   | <i>16S rDNA</i> | AGAGTTTGATCMTGGCTCAG   | Universal sequencing primer |
| 1492R | <i>16S rDNA</i> | TACGGYTACCTTGTTACGACTT | Universal sequencing primer |
| 785F  | <i>16S rDNA</i> | GGATTAGATACCCTGGTA     | Universal sequencing primer |

|           |                 |                                     |                               |
|-----------|-----------------|-------------------------------------|-------------------------------|
| 805R      | <i>16S rDNA</i> | GACTACCAGGGTATCTAATC                | Universal sequencing primer   |
| 518R      | <i>16S rDNA</i> | GTATTACCGCGGCTGCTGG                 | Universal sequencing primer   |
| 1100F     | <i>16S rDNA</i> | YAACGAGCGCAACCC                     | Universal sequencing primer   |
| MAR 4 fwd | <i>16S rDNA</i> | TGCCTTCTACAGAGGGATAGCC              | Fringuelli et al. (2012) [25] |
| MAR rev   | <i>16S rDNA</i> | CTATCGTTGCCATGGTAAGCCG              | Fringuelli et al. (2012) [25] |
| MAR probe | <i>16S rDNA</i> | Texas Red -CACTTTGGAATGGCATCG- BHQ2 | Fringuelli et al. (2012) [25] |

519

520 **S2 Table. Accession number of the type strains used in S1 Fig.**

| Type strains                                | Genome accession number |
|---------------------------------------------|-------------------------|
| <i>Tenacibaculum adriaticum</i> B390        | AM412314                |
| <i>Tenacibaculum aestuarii</i> SMK-4        | DQ314760                |
| <i>Tenacibaculum aestuariivivum</i> JDTF-79 | MF193601                |
| <i>Tenacibaculum agarivorans</i> HZ1        | MSMP01000073            |
| <i>Tenacibaculum aiptasiae</i> a4           | EF416572                |
| <i>Tenacibaculum amylolyticum</i> MBIC4355  | AB032505                |
| <i>Tenacibaculum ascidiaceicola</i> RSS1-6  | KT231981                |
| <i>Tenacibaculum caenipelagi</i> HJ-26M     | KC832834                |
| <i>Tenacibaculum crassostreae</i> JO-1      | EU428783                |
| <i>Tenacibaculum dicentrarchi</i> 35/09     | FN545354                |
| <i>Tenacibaculum discolor</i> DSM 18842     | RCCS01000002            |
| <i>Tenacibaculum finnmarkense</i> DSM 28541 | KT270385                |
| <i>Tenacibaculum gallaicum</i> A37.1        | AM746477                |
| <i>Tenacibaculum geojense</i> YCS-6         | HQ401023                |
| <i>Tenacibaculum halocynthiae</i> P-R2A1-2  | JX912707                |
| <i>Tenacibaculum haliotis</i> RA3-2         | KX450476                |
| <i>Tenacibaculum holothuriorum</i> S2-2     | LAPZ01000023            |
| <i>Tenacibaculum insulae</i> JDTF-31        | MF765760.1              |
| <i>Tenacibaculum jejuense</i> KCTC 22618    | LT899436                |
| <i>Tenacibaculum litopenaei</i> B-I         | DQ822567                |
| <i>Tenacibaculum litoreum</i> CL-TF13       | AY962294                |
| <i>Tenacibaculum lutimaris</i> DSM 16505    | RAQM01000002            |
| <i>Tenacibaculum maritimum</i> NCIMB 2154   | KT270382.1              |
| <i>Tenacibaculum mesophilum</i> DSM 13764   | jgi.1107970             |
| <i>Tenacibaculum ovolyticum</i> IFO 15947   | AB078058                |
| <i>Tenacibaculum piscium</i> TNO020         | GU124766                |
| <i>Tenacibaculum sediminilitoris</i> YKTF-3 | KU696540                |
| <i>Tenacibaculum singaporense</i> TLL-A2    | MG641897                |
| <i>Tenacibaculum skagerrakense</i> D30      | AF469612                |
| <i>Tenacibaculum soleae</i> LL04 12.1.7     | AM746476                |
| <i>Tenacibaculum todarodis</i> LPB0136      | CP018155                |

|                                      |          |
|--------------------------------------|----------|
| <i>Tenacibaculum xiamenense</i> WJ-1 | JX984443 |
|--------------------------------------|----------|

521



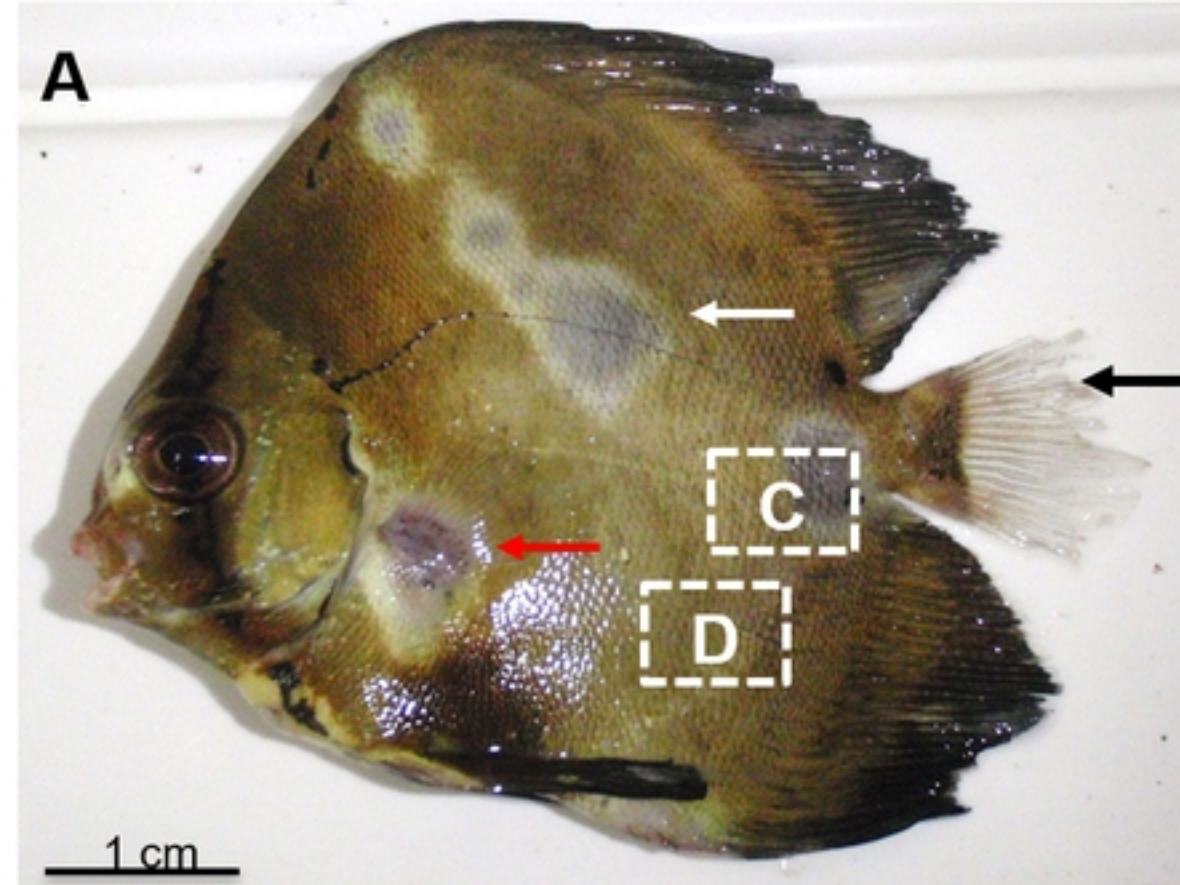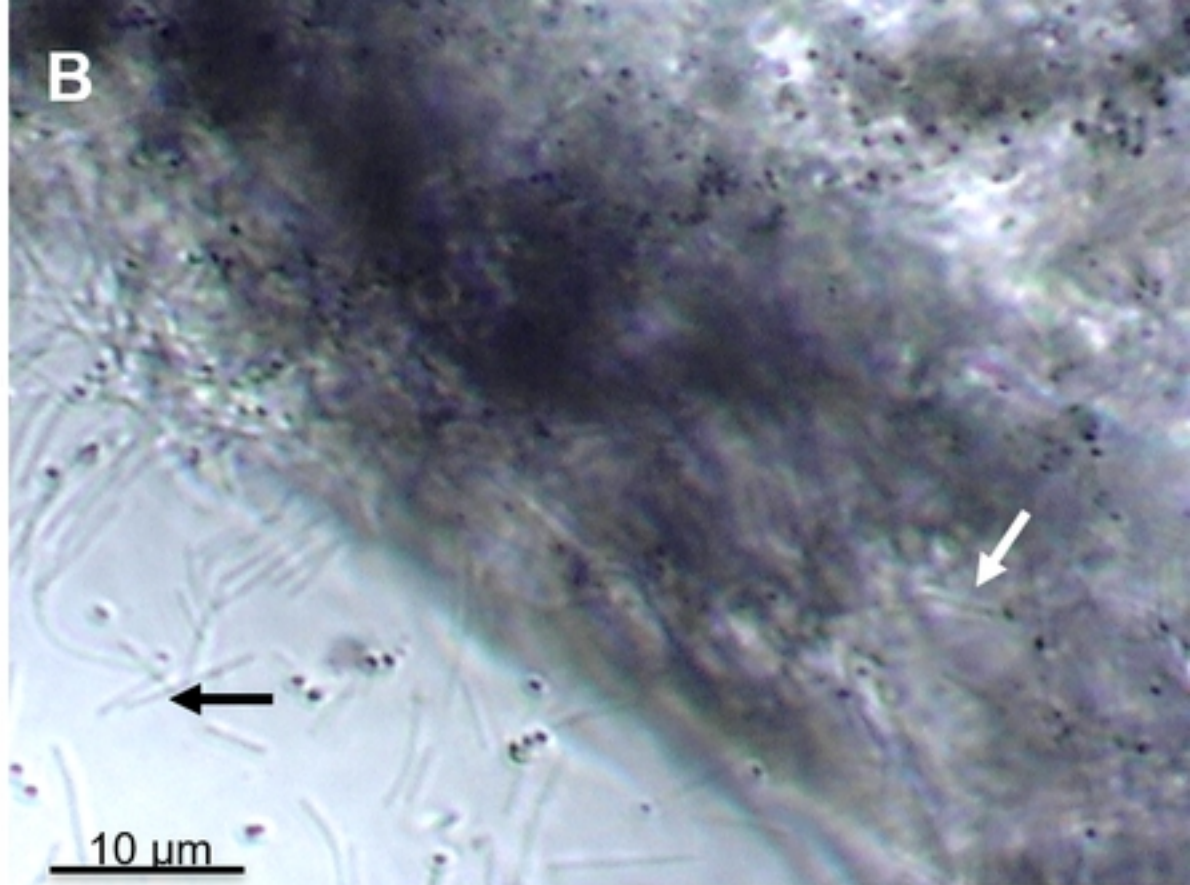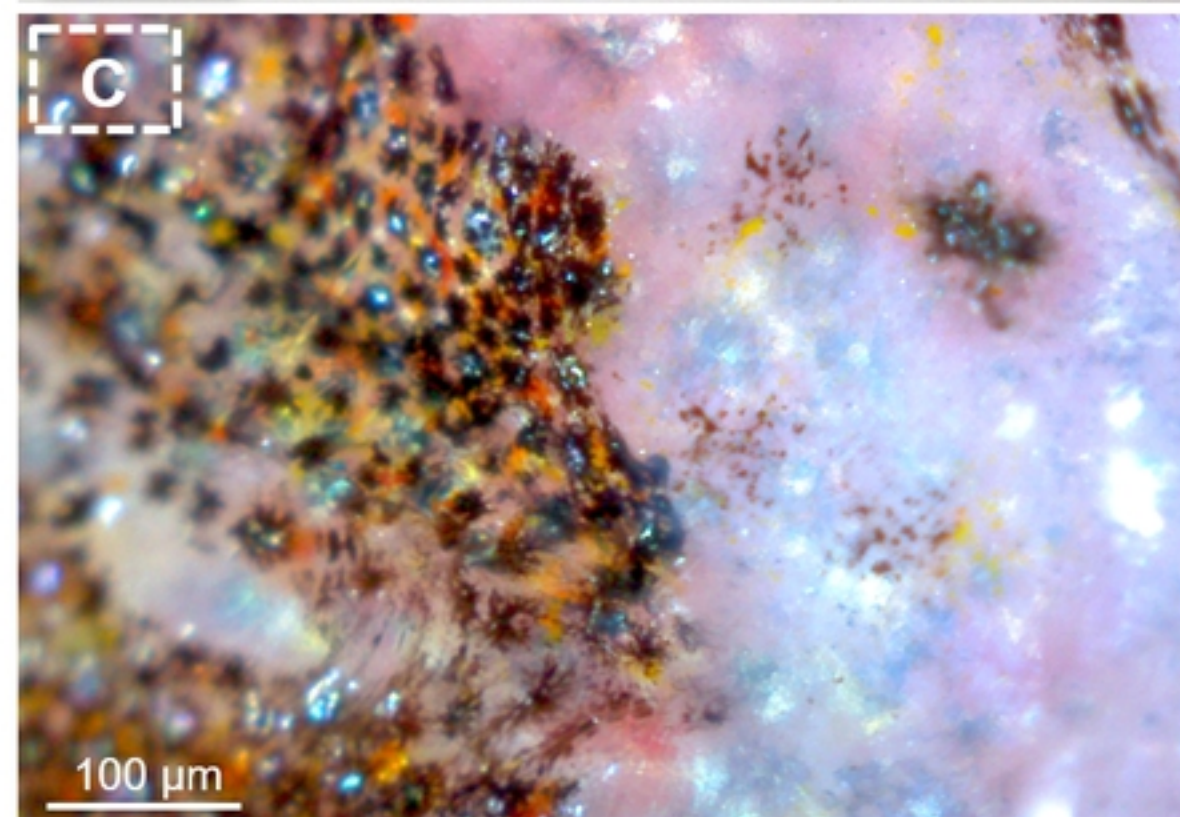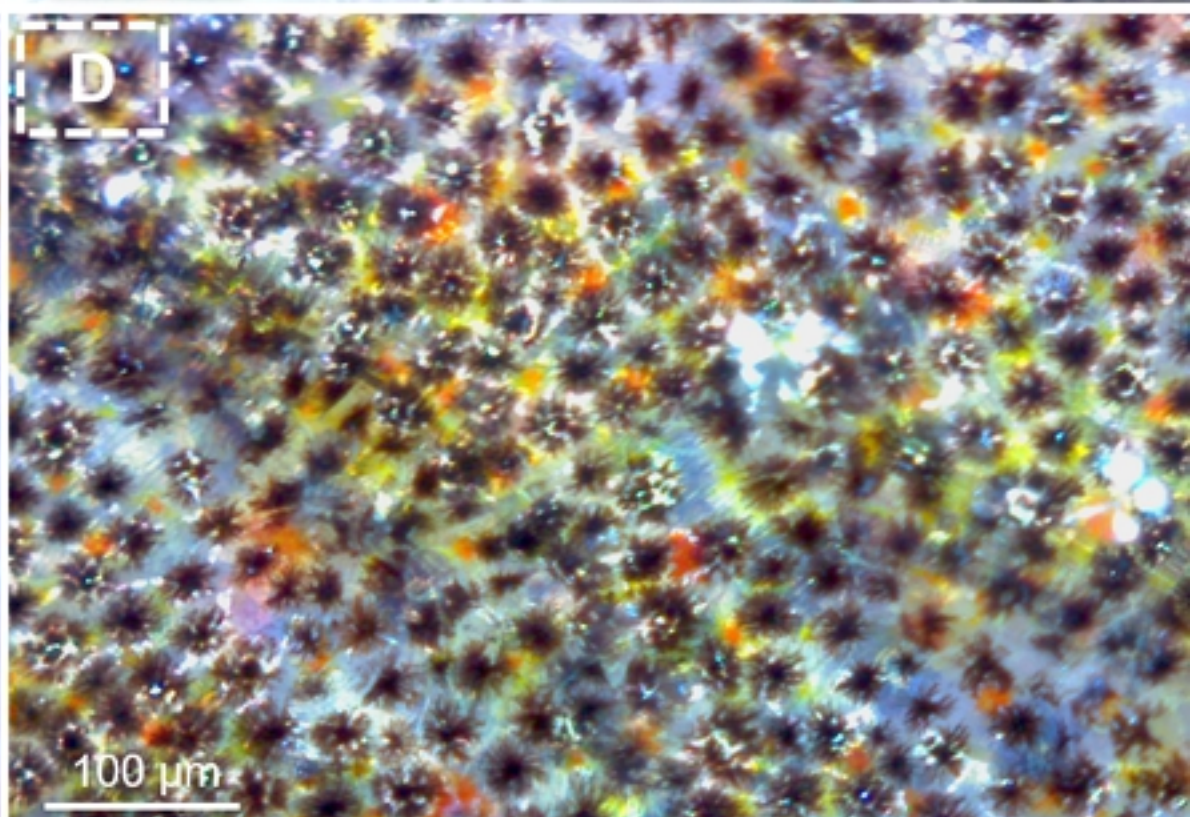

Figure 1



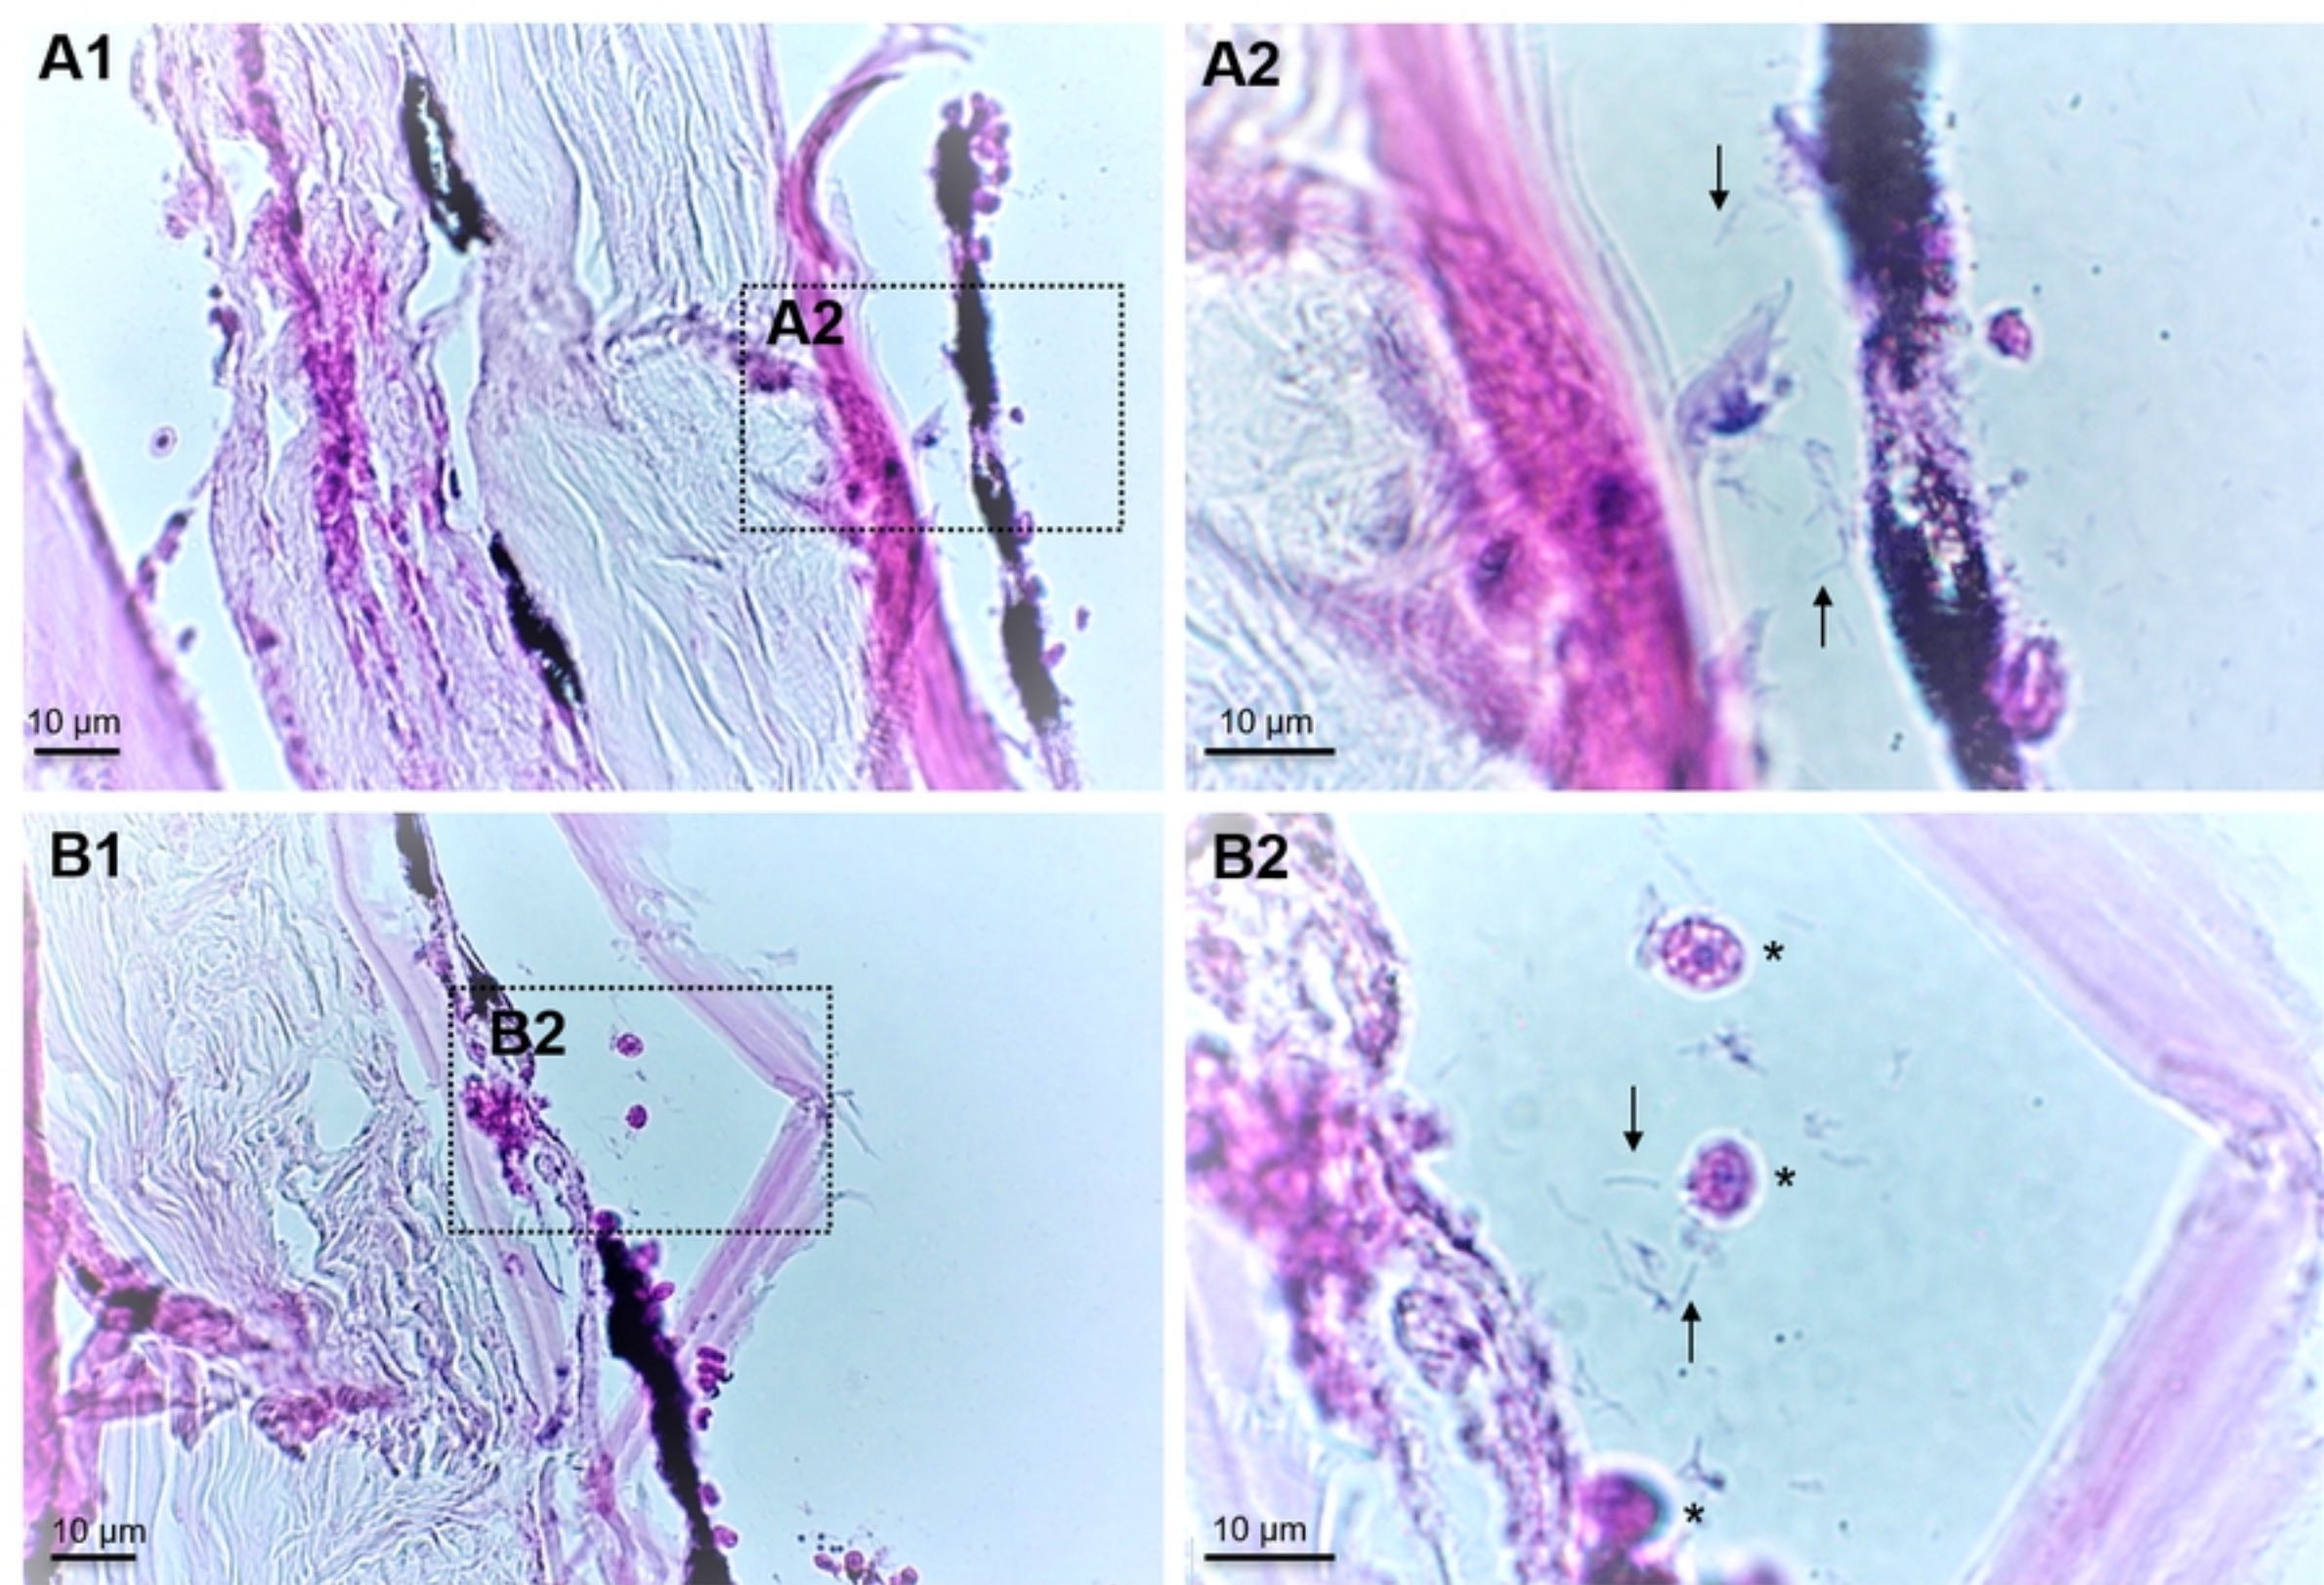

Figure 2



Tree scale: 0.001

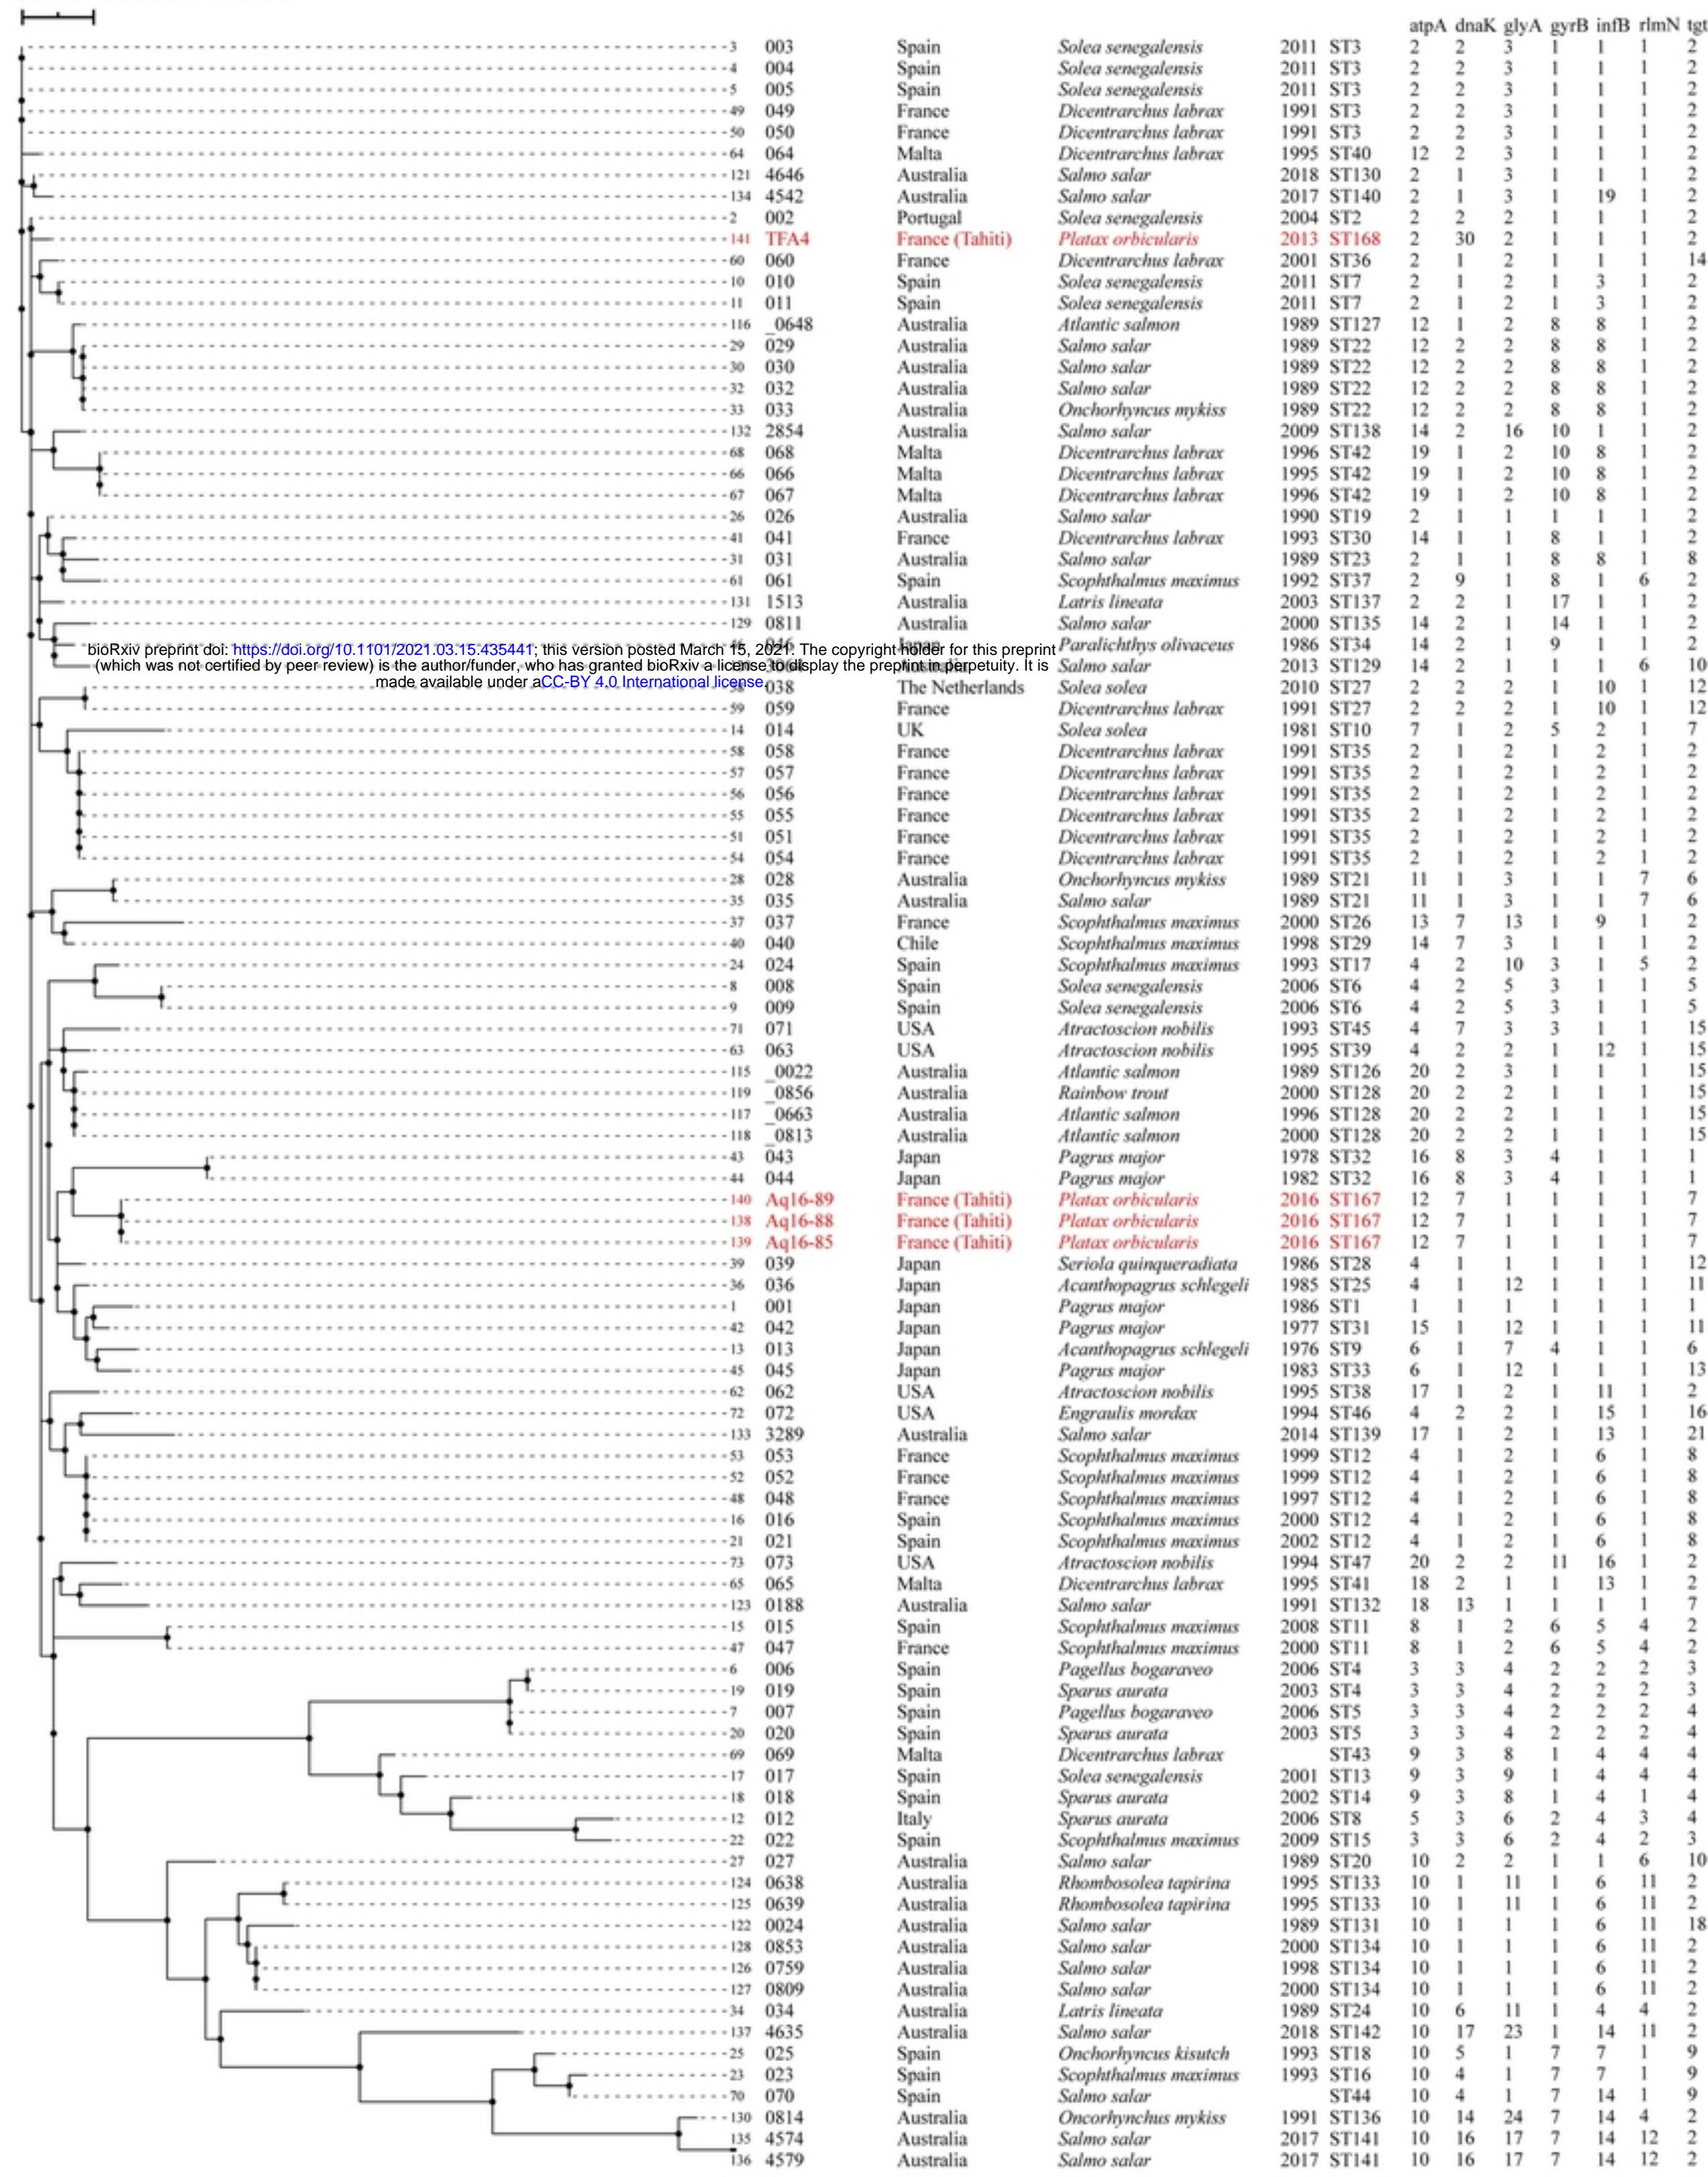

Figure 4

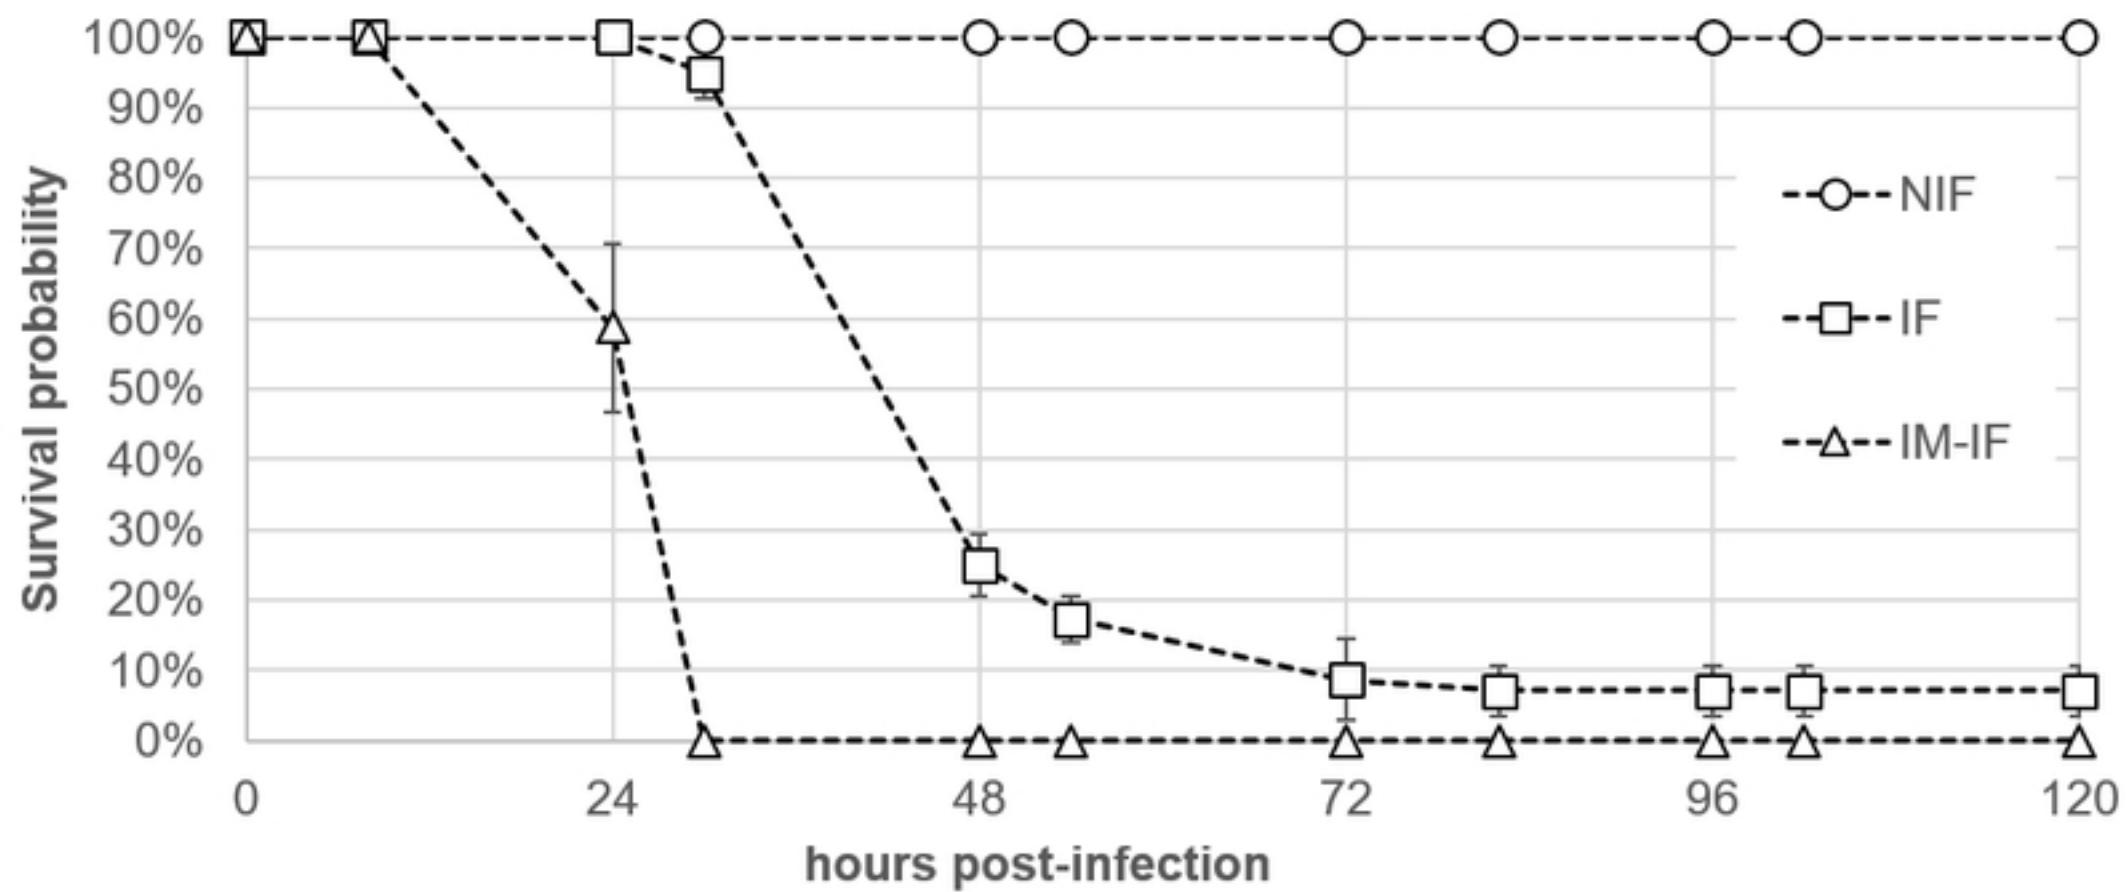

Figure 5

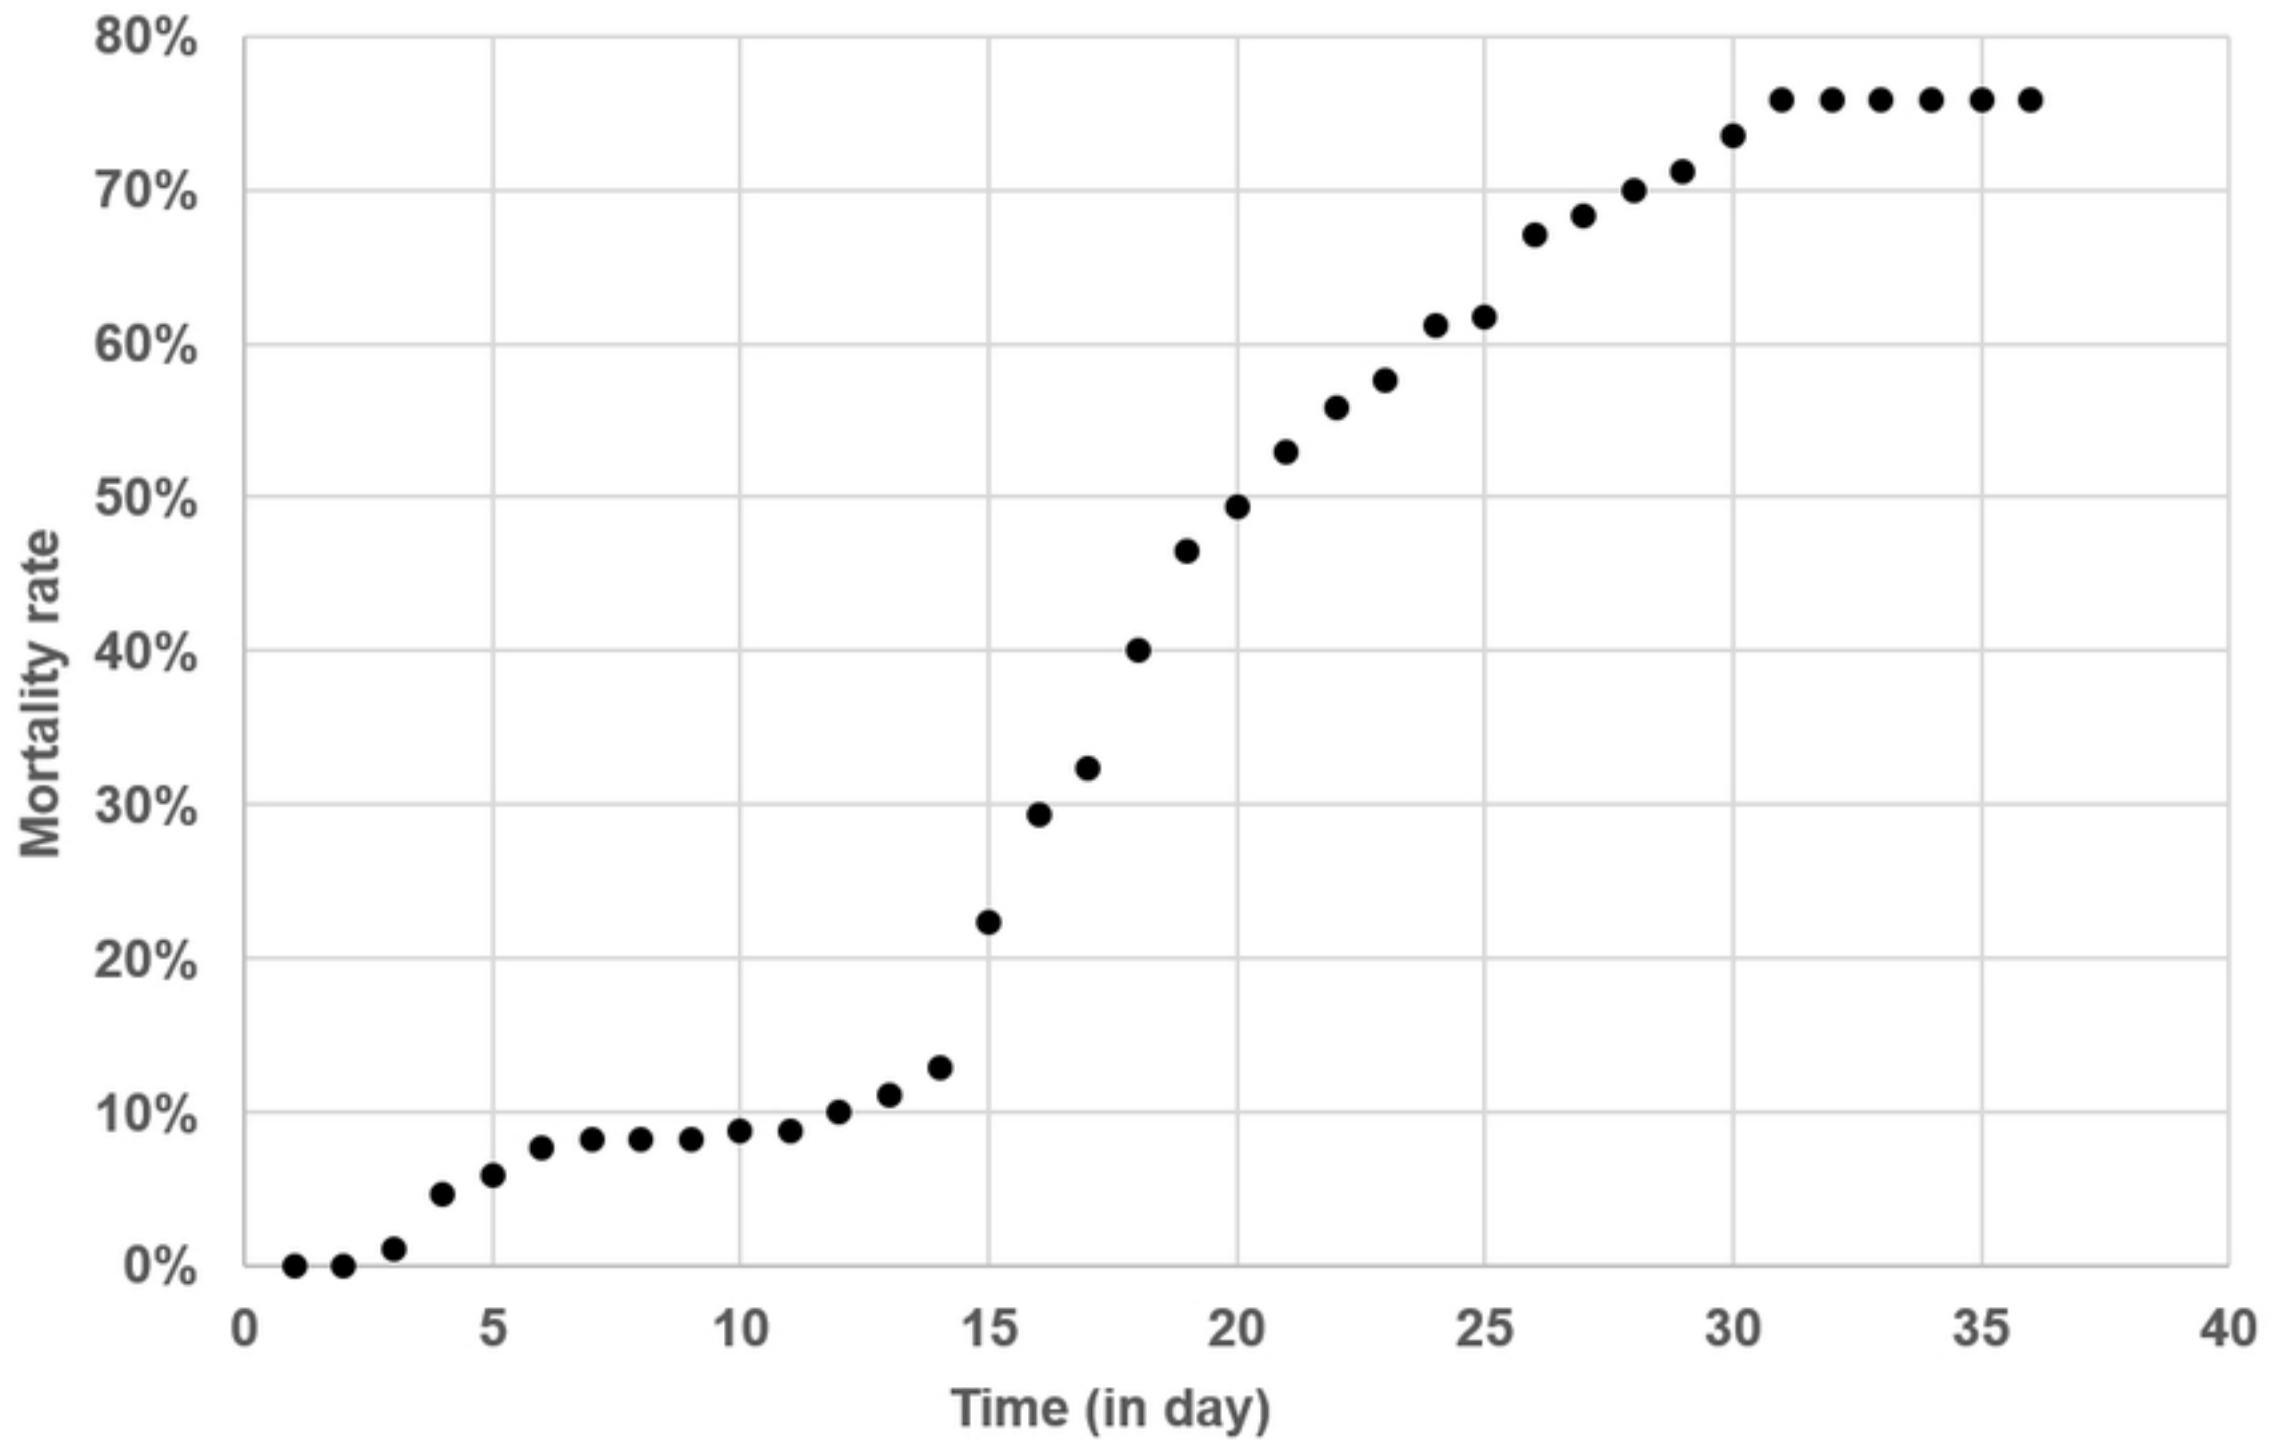

Figure 6

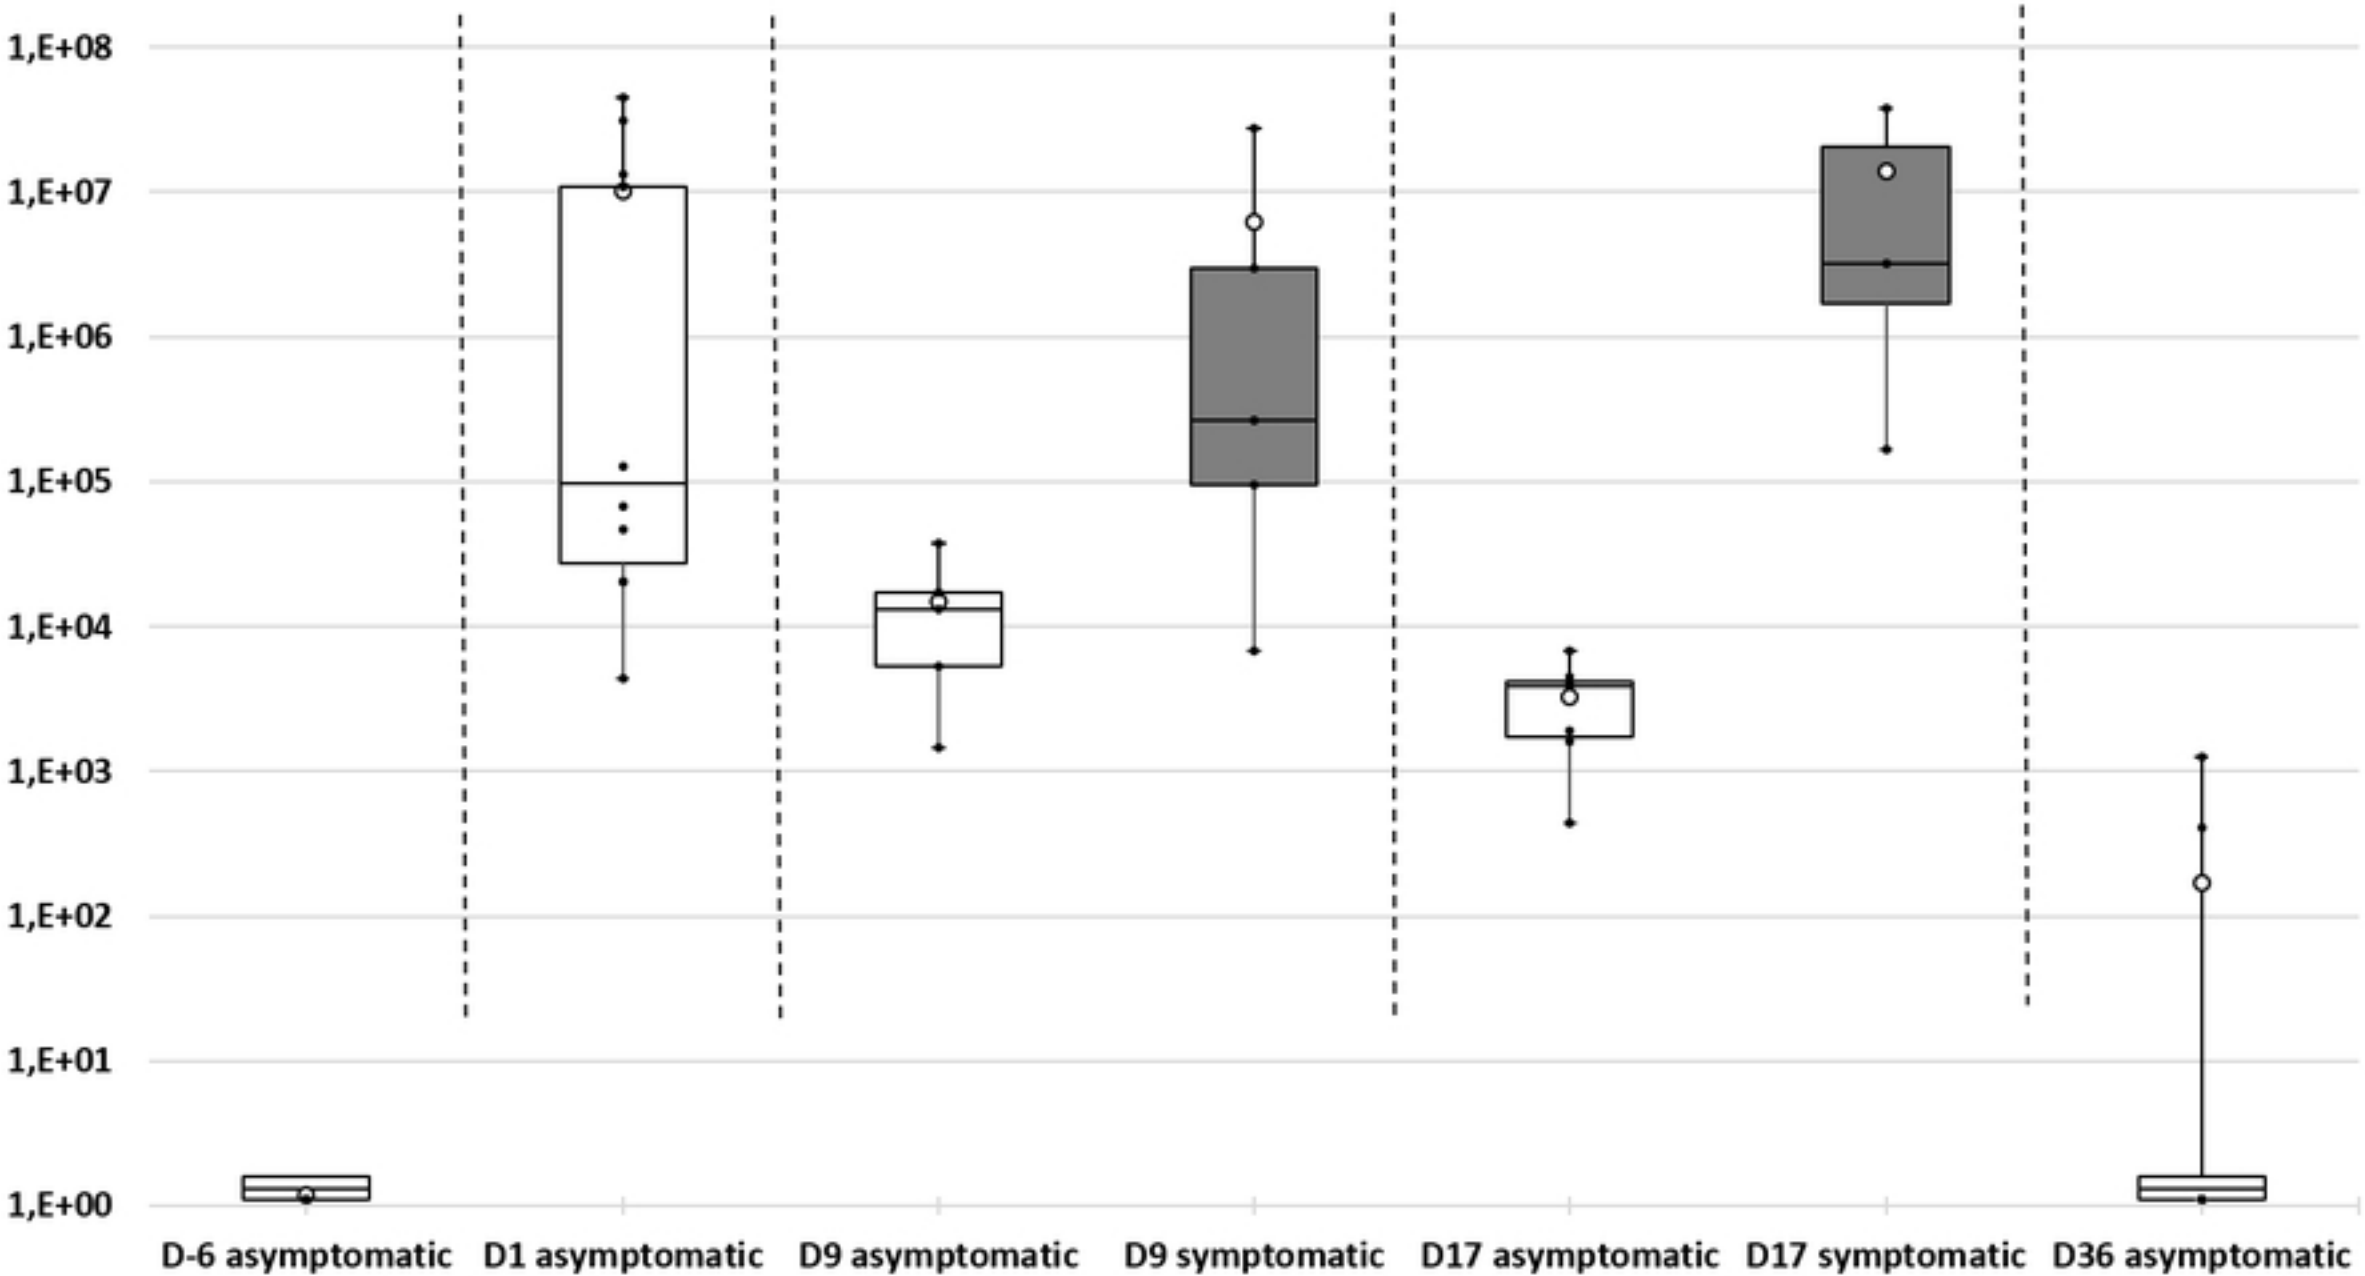

Figure 7



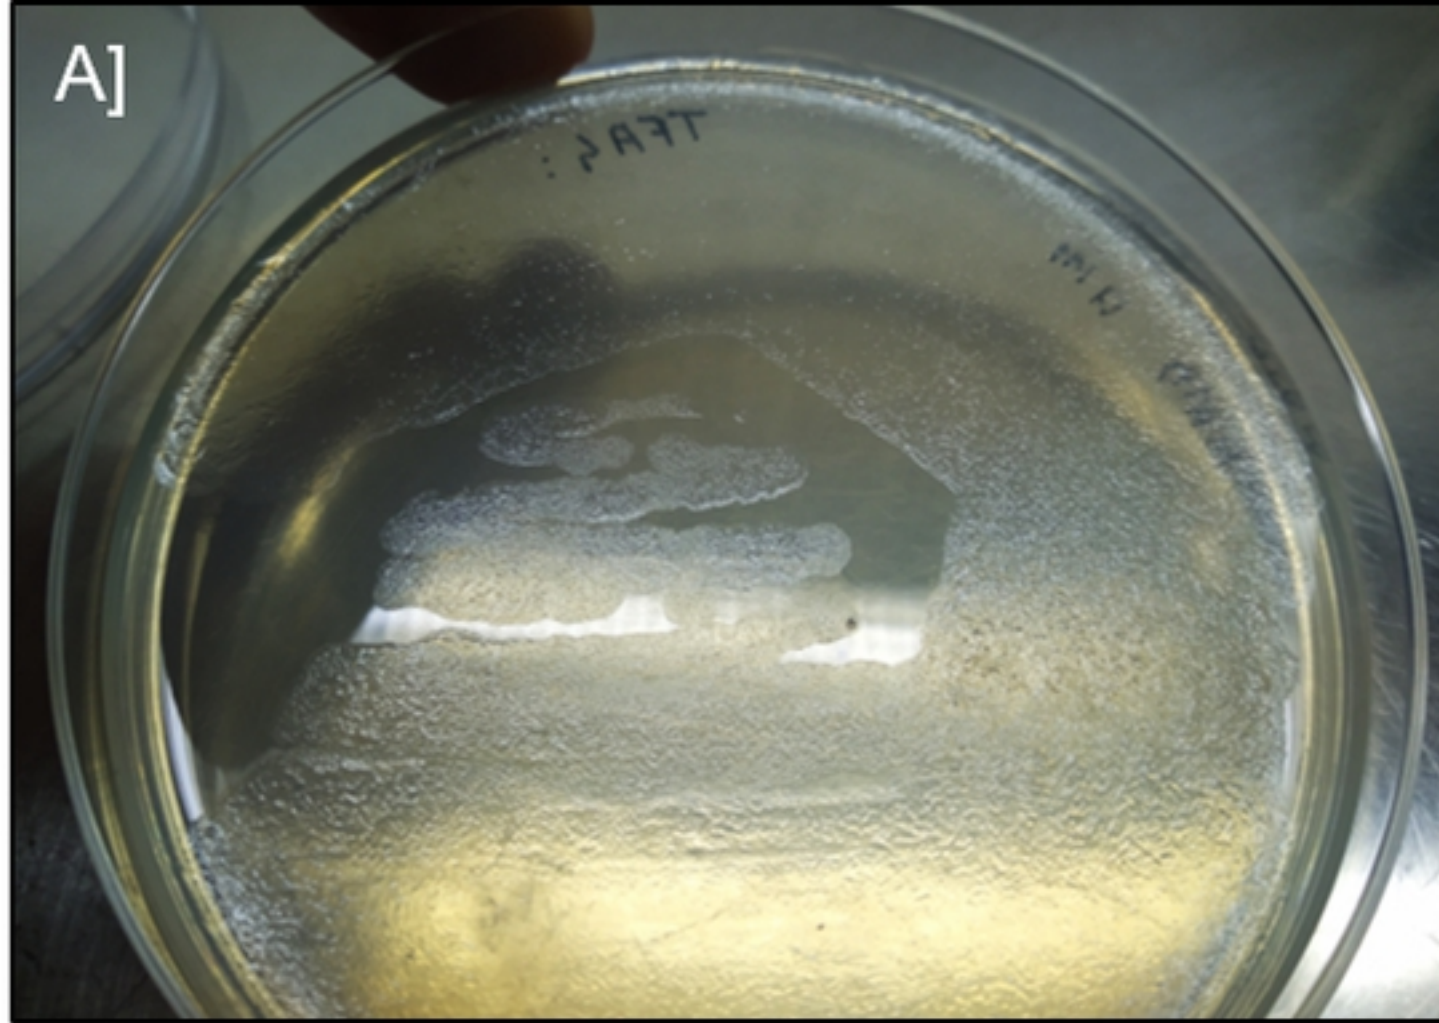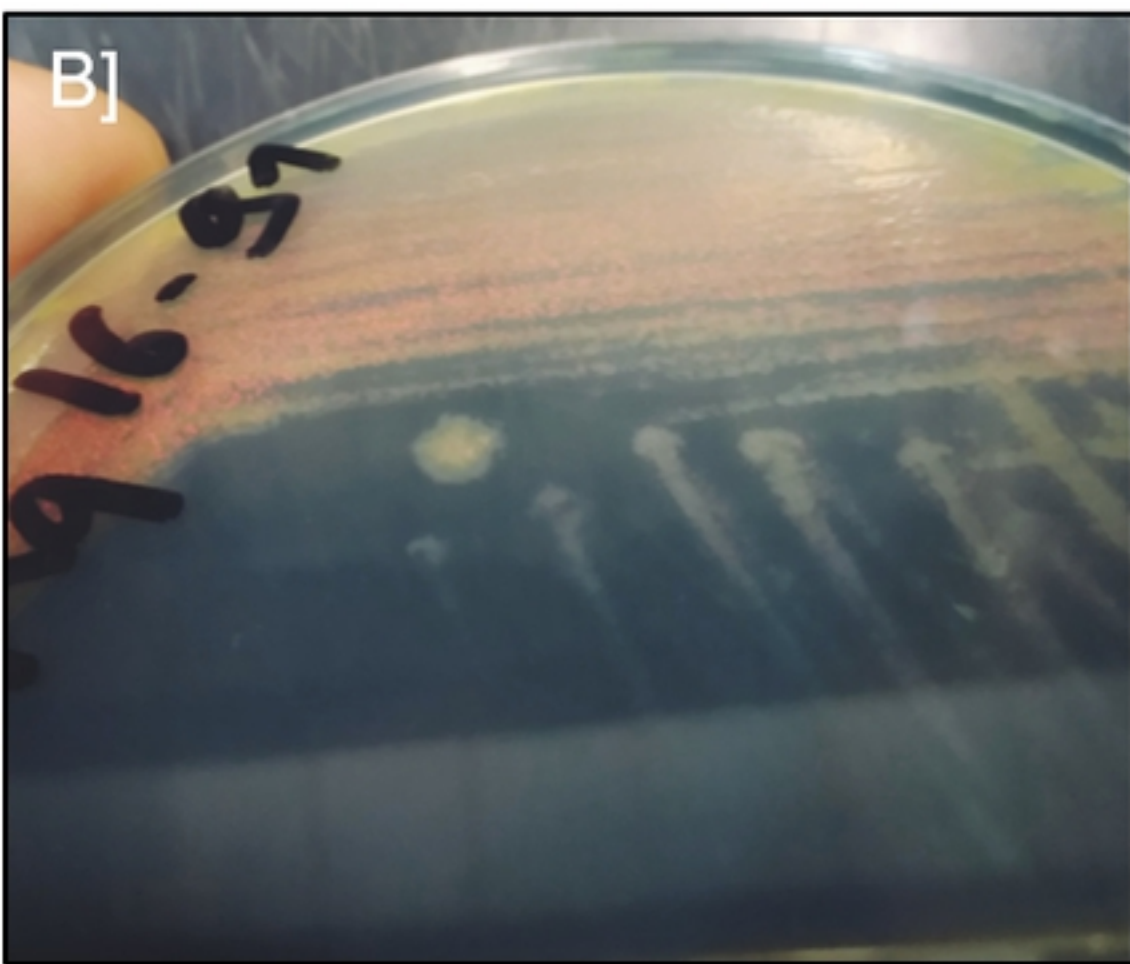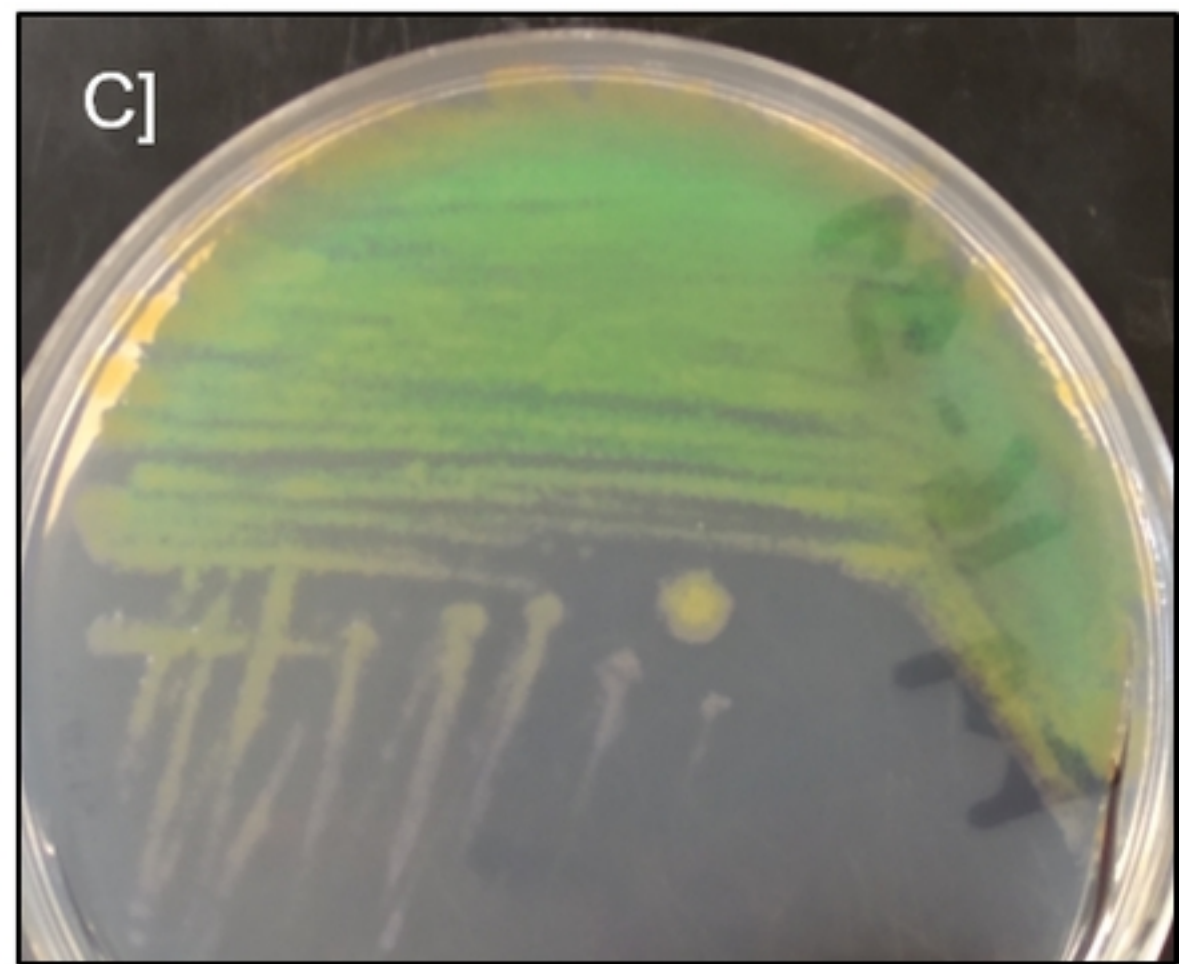

Figure 3
